# Supplementary material for: Experiences using the poststroke checklist in Sweden with a focus on feasibility and relevance: a mixed-method design
Source: PubMed Central journal article supplement (PMC6528008; doi:10.1136/bmjopen-2018-028218), 2019-05-09
Supplement: bmjopen-2018-028218.draft_revisions.pdf [file bmjopen-2018-028218.draft_revisions.pdf]

# BMJ Open

BMJ Open is committed to open peer review. As part of this commitment we make the peer review history of every article we publish publicly available.

When an article is published we post the peer reviewers' comments and the authors' responses online. We also post the versions of the paper that were used during peer review. These are the versions that the peer review comments apply to.

The versions of the paper that follow are the versions that were submitted during the peer review process. They are not the versions of record or the final published versions. They should not be cited or distributed as the published version of this manuscript.

BMJ Open is an open access journal and the full, final, typeset and author-corrected version of record of the manuscript is available on our site with no access controls, subscription charges or pay-per-view fees (<http://bmjopen.bmj.com>).

If you have any questions on BMJ Open's open peer review process please email [info.bmjopen@bmj.com](mailto:info.bmjopen@bmj.com)

# BMJ Open

## Experiences using the Post-Stroke Checklist in Sweden with a focus on feasibility and relevance: a mixed-method design

|                               |                                                                                                                                                                                                                                                                                                                                                                                                                                                                                                                        |
|-------------------------------|------------------------------------------------------------------------------------------------------------------------------------------------------------------------------------------------------------------------------------------------------------------------------------------------------------------------------------------------------------------------------------------------------------------------------------------------------------------------------------------------------------------------|
| Journal:                      | <i>BMJ Open</i>                                                                                                                                                                                                                                                                                                                                                                                                                                                                                                        |
| Manuscript ID                 | bmjopen-2018-028218                                                                                                                                                                                                                                                                                                                                                                                                                                                                                                    |
| Article Type:                 | Research                                                                                                                                                                                                                                                                                                                                                                                                                                                                                                               |
| Date Submitted by the Author: | 27-Nov-2018                                                                                                                                                                                                                                                                                                                                                                                                                                                                                                            |
| Complete List of Authors:     | Kjörk, Emma K; University of Gothenburg, Institute of Neuroscience and Physiology, Department of Clinical Neuroscience<br>Carlsson, Gunnel; University of Gothenburg, Institute of Neuroscience and Physiology, Department of Clinical Neuroscience<br>Sunnerhagen, Katharina; University of Gothenburg, Institute of Neuroscience and Physiology, Department of Clinical Neuroscience<br>Lundgren-Nilsson, Asa; Gothenburg University, Institute of Neuroscience and Physiology, Department och Clinical Neuroscience |
| Keywords:                     | long-term care, Feasibility, Focus groups, Follow-up, Standard of Care, Stroke < NEUROLOGY                                                                                                                                                                                                                                                                                                                                                                                                                             |
|                               |                                                                                                                                                                                                                                                                                                                                                                                                                                                                                                                        |

SCHOLARONE™  
Manuscripts

# Experiences using the Post-Stroke Checklist in Sweden with a focus on feasibility and relevance: a mixed-method design

Emma K Kjörk\* OT, MS<sup>1,2</sup>, Gunnel Carlsson OT, PhD<sup>1</sup>, Katharina S Sunnerhagen MD, PhD, Prof<sup>1</sup> and Åsa Lundgren-Nilsson OT, PhD<sup>1</sup>

<sup>1</sup>Institute of Neuroscience and Physiology, Dep of Clinical Neuroscience, Sahlgrenska Academy at University of Gothenburg, Gothenburg, Sweden

<sup>2</sup>Department of Occupational Therapy and Physiotherapy, Sahlgrenska University Hospital, Gothenburg, Sweden

## \* Corresponding author:

Emma K Kjörk

Email address: [emma.kjork@neuro.gu.se](mailto:emma.kjork@neuro.gu.se)

Telephone: +46313422803

Postal address:

Institute of Neuroscience and Physiology

Dep of Clinical Neuroscience, Rehabilitation medicine

Per Dubbsgatan 14, fl. 3, 413 45 Gothenburg, Sweden

Word count Abstract: 286 words

Word count Main manuscript: 3769 words

Number of tables: 3

Number of figures: 3

# Experiences using the Post-Stroke Checklist in Sweden with a focus on feasibility and relevance: a mixed-method design

## ABSTRACT

**Objective** The wide range of outcomes after stroke emphasises the need for comprehensive long-term follow-up. The aim of this study was to evaluate how persons with stroke and health professionals perceive the use of the Post-Stroke Checklist (PSC), with a focus on feasibility and relevance.

**Design** An exploratory design with a mix of qualitative and quantitative methods.

**Setting** Outpatient care at a university hospital and primary care centres in western Sweden.

**Participants** Forty-six consecutive patients (median age, 70; range, 41–85; 13 women) and ten health professionals (median age 46; range, 35–63; 7 women).

**Results** Most patients (87%) had one or more problems identified by the PSC. The most common problem areas were life after stroke (61%), cognition (56%), mood (41%), and activities of daily living (39%). Three organisational themes emerged from the focus group discussions. The perception of *the content and relevance of the PSC* was that common post-stroke problems were covered but that unmet needs still could be missed. Identifying needs was facilitated when using the *PSC as a tool for dialogue*. The dialogue between the patient and caregiver as well as stroke competence was perceived as important. The PSC was seen as *a systematic routine and a base for egalitarian follow-up*, but participants stressed consideration given to each individual. Addressing identified needs and meeting patient expectations were described as challenging given available healthcare services.

**Conclusions** The PSC is a feasible and relevant tool to support egalitarian follow-up and identify patients who could benefit from targeted post-stroke interventions. Stroke competence, room for dialogue, and caring for identified needs emerged as important issues to consider when using the PSC. The PSC can facilitate patients in expressing their needs, enhancing their ability to participate in decision-making.

1  
2  
3 **Keywords** Stroke, Rehabilitation, Standard of care, Feasibility, Focus groups, Follow-up  
4  
5

6  
7 **Strengths and limitations (bullet points)**  
8

- 9
- 10 • A strength of this study is having patients as partners throughout the project, from the  
11 translation process to participation in the focus groups.  
12
  - 13
  - 14 • The mix of methods made it possible to explore the feasibility of the PSC from  
15 different perspectives and at different levels compared to previous research.  
16
  - 17
  - 18
  - 19 • A limitation is the lack of data collected from persons with severe stroke, although this  
20 lack is typical of this naturalistic design and representative for the Swedish stroke  
21 population.  
22
  - 23
  - 24
  - 25
  - 26 • A study strength is the heterogeneous population from different outpatient settings,  
27 including a range of ages, stroke characteristics, and education levels, and health  
28 professionals with a range of experience in stroke care.  
29
  - 30
  - 31
  - 32
  - 33 • The study was conducted in a Swedish context, and the transferability of the findings  
34 in other cultural contexts is not known.  
35  
36  
37  
38  
39  
40  
41  
42  
43  
44  
45  
46  
47  
48  
49  
50  
51  
52  
53  
54  
55  
56  
57  
58  
59  
60

## INTRODUCTION

Post-stroke impairments often have long-term negative consequences for social relationships, dependence in daily life, and quality of life.<sup>1</sup> Perceived unfulfilled rehabilitation needs and changes in functioning during the first year after stroke<sup>2,3</sup> indicate the need for systematic long-term follow-up. Furthermore, a subtle decline in cognition as well as emotional problems<sup>4,5</sup> can easily be overlooked, leading to difficulty in accessing healthcare services.<sup>6,7</sup>

The adaptation process after stroke is long. In later phases, the focus changes from the stroke itself to more familiar aspects of daily life,<sup>8</sup> which may not be sufficiently targeted in current practice. Concordance is poor between perceived problems and problems detected by standardised assessments. Accordingly, dialogue should complement assessments to ensure that health services are based on patient needs,<sup>9</sup> in line with a person-centred approach.<sup>10</sup>

The Post-Stroke Checklist (PSC)<sup>11</sup> was developed to identify long-term care needs and facilitate referrals.<sup>11,12</sup> Although the PSC has been found to be feasible and useful,<sup>12-14</sup> knowledge is lacking about the perspectives of patients and health professionals (HPs) regarding its use in the Swedish health care context. The aim of this study was to evaluate how persons with stroke and HPs perceive the use of the PSC, with a focus on feasibility and relevance.

## METHODS

### Study design

The study has an exploratory design. To capture the feasibility of using the PSC, we combined it with a satisfaction questionnaire and focus group discussions,<sup>15,16</sup> in line with guidelines for complex interventions.<sup>17</sup> This study is part of a validation and cultural adaptation process<sup>18</sup> of the PSC in Sweden (figure 1). By combining data collection methods, we expected to gain a deeper understanding of using the PSC as a tool to structure follow-up. The underpinning methodology in the focus groups is based on social constructivism.<sup>16</sup> Consolidated criteria for reporting qualitative research (i.e., COREQ guidelines)<sup>19</sup> were followed for reporting qualitative data.

[Insert figure 1 near here]

## Patient and public involvement

This study explores how persons with stroke experience the PSC. People from the Swedish Stroke Association (patient association) were involved in the translation process, the pilot testing of the interview guide, and focus group discussions and have been given a presentation of preliminary results.

## Participants

Participants were consecutively recruited while at a clinical visit in primary care or stroke specialised outpatient care at a university hospital, February 2015 to October 2015. The inclusion criterion was having had a stroke, regardless of the time of onset. The number of patients included was in accordance with a previous study<sup>12</sup> and principles for cross-cultural adaptation suggesting approximately 40.<sup>18</sup> Patients were excluded if cognitive impairment or insufficient knowledge of Swedish would have made the response to the PSC items unreliable. HPs from different clinics were invited to participate and selected to represent different professions. A purposive sampling was used to achieve heterogeneity and homogeneity in the focus groups.<sup>15 16</sup> Written informed consent was obtained from all participants, and the regional ethical review board in Gothenburg approved the study (no. 521-14).

## Data collection

The PSC<sup>11</sup> has 11 items and is intended to identify post-stroke problems. It was developed by a multi-professional group of stroke experts, according to a Delphi process. Problem areas were chosen for having the greatest impact on patient quality of life that could be addressed with evidence-based interventions. The PSC includes secondary prevention, activities of daily living (ADLs), mobility, spasticity, pain, incontinence, communication, mood, cognition, life after stroke, and relationship with family. A response scale includes 'yes' and 'no' and recommended referrals adjacent to each problem area.<sup>11</sup>

Data collection was conducted in outpatient clinical facilities in two steps. For step 1, the HP administered the PSC to patients at a regular clinical visit (proxy responses were allowed). No additional training was given beyond the general instructions on the PSC. Participants were asked to reflect on the usefulness of the PSC as the basis for focus group discussions. Patients and HPs assessed satisfaction with the PSC after each visit through a satisfaction questionnaire with questions analogous to those used in a previous study.<sup>12</sup> The answers were rated on a Likert scale of 1–5, where 1 indicated not satisfied and 5 completely

1  
2  
3 satisfied. To ensure anonymity, patient responses were collected in an envelope. Demographic  
4 data (time since index stroke, age, sex), time to administration of the PSC, and HP profession  
5 were registered. Of the patients who gave informed consent, additional patient characteristics  
6 (such as type of stroke, aphasia, ADL dependency) were collected retrospectively from their  
7 medical records.  
8  
9

10  
11 For step 2, the staff invited all participants during the follow-up to join in a focus group  
12 discussion. A set time of approximately 1-2 months was given between the visit and the focus  
13 group discussions. The first author (EK) telephoned participants willing to participate and sent  
14 them the study information letter, time for appointment, and a copy of the PSC. In total, four  
15 focus groups were conducted using a question guide.<sup>15</sup> Each focus group met once for  
16 approximately 1.5 hours. The meeting was recorded and transcribed verbatim. Initially in the  
17 focus groups, the importance of bringing up different opinions was emphasised. At the end, an  
18 oral overview was presented to ensure that participant contributions were as they intended.  
19  
20  
21  
22  
23  
24  
25

## 26 27 **Data analysis**

28 Data gathered from PSC items, questionnaires, and demographic information were analysed  
29 using descriptive statistics with Statistical Package for the Social Sciences version 24. Data  
30 gathered from focus groups were analysed following Kreuger.<sup>15</sup> The aim of the analysis  
31 process was to describe the participants' perceptions and experiences based on the aim of the  
32 study.  
33  
34  
35  
36

37 Immediately after each focus group discussion, a written summary was created. The  
38 transcripts were coded using the computer software NVivo. First, the transcripts were read in  
39 their entirety to allow familiarity with the content as a whole, and discussions relevant to the  
40 aim were identified. Second, transcripts were systematised into categories based on  
41 similarities and differences in the discussions. Third, a descriptive summary was made for  
42 each category, adhering as closely as possible to the content of the raw data. Finally, these  
43 summaries in combination with selected quotes served as the basis for the interpretation and  
44 presented a deeper insight into the findings. In the analysis process, identified patterns were  
45 compared and contrasted across all four groups, resulting in an overarching thematic structure  
46 (for examples of the coding tree and themes see table 1 and figure 3). Quotations that showed  
47 the ongoing discussions<sup>16</sup> were selected to illuminate the results. Based on sampling  
48 strategies<sup>20</sup> and when similar discussions recurred in all groups<sup>15</sup>, data gathering stopped.  
49  
50  
51  
52  
53  
54  
55  
56  
57

58 The first author (PhD student, OT, woman) was the moderator and performed most of  
59 the analysis. Multiple coding, continuous interpretation of data, and discussion of the  
60



emerging themes were completed together with the second author (PhD, OT, woman) to ensure accuracy of the analysis. The first author had knowledge about the study topic and the second author in qualitative methods. Both have conducted interviews previously. The third author (PhD, MD, woman) and last author (PhD, OT, woman) contributed with knowledge concerning revising and refining the themes. All authors have at least 20 years of experience in stroke rehabilitation.

Table 1. Examples illustrating the coding tree.

| Quote                                                                                                                                                                                                                                                                                                                                                             | Code                                                                        | Subtheme                                                                                         |
|-------------------------------------------------------------------------------------------------------------------------------------------------------------------------------------------------------------------------------------------------------------------------------------------------------------------------------------------------------------------|-----------------------------------------------------------------------------|--------------------------------------------------------------------------------------------------|
| P4: "It has a lot to do with the competence of the person who's asking the questions so they can do the thinking to squeeze it all in"<br>(Group 1 Patients)                                                                                                                                                                                                      | The professionals competence and reasoning                                  | The importance of HPs' competence in stroke and communication skills for capturing patient needs |
| P2: So, I think it has just been positive, and it is also done so quickly.<br>P1: That's also a positive.<br>P2: Yeah, it's fast, but you can also develop it as much as you want. But asking the questions doesn't take too long.<br>Moderator: Is it quick?<br>P1: Yes. It also depends on what answers you get.<br>P2: Yes.<br>(Group 4. Health professionals) | The administration of the PSC can be adapted, quickly done or more in-depth | The PSC supports continuity and referrals but depends on available resources                     |

## RESULTS

### Study group

The PSC was used in connection with a clinical visit in 46 patients. All patients lived in their homes. Most of them (65%) had experienced a stroke within 3 months at enrolment. The median time for hospitalisation was 8 days. Stroke severity at stroke onset was mild, with a median of 2 according to National Institutes of Health Stroke Scale. Table 2 shows the characteristics of the participants and the focus groups.

Table 2. Characteristics of patients and health professionals in the clinical outpatient visits and the focus group discussions. Data are presented as number of persons (n) or median and range.

| <b>Patients</b>                   | Clinical visit<br>(n=46) | Focus group 1<br>(n=4) | Focus group 2<br>(n=6) |
|-----------------------------------|--------------------------|------------------------|------------------------|
| Primary care, rural               |                          | x                      |                        |
| Specialized care, urban           |                          |                        | x                      |
| Age at inclusion                  | 70 (41-85)               | 71 (58-78)             | 74 (45-76)             |
| Sex, male                         | 33                       | 4                      | 5                      |
| Education                         |                          |                        |                        |
| Mandatory                         | 20                       | 1                      | 4                      |
| High School                       | 13                       | 1                      | 1                      |
| University                        | 8                        | 2                      | 1                      |
| Months since stroke               | 3 (1-84)                 | 20 (3-84)              | 3 (1-6)                |
| Working at stroke onset (yes)     | 13                       | 2                      | 1                      |
| Length of hospitalization, (days) | 8 (2-120)                | 11 (5-82)              | 8 (4-11)               |
| History of stroke (yes)           | 9                        | 1                      | 3                      |
| Stroke characteristics            |                          |                        |                        |
| Ischemic/Hemorrhagic              | 36/5                     | 4/0                    | 4/2                    |
| Right/ left/ posterior/ bilateral | 19/16/5/2                | 3/1/0/0                | 3/2/1/0                |
| NIHSS                             | 2 (0-16)                 | 4 (3-10)               | 2 (1-6)                |
| Aphasia (yes)                     | 9                        | 0                      | 1                      |
| Neglect (yes)                     | 4                        | 1                      | 0                      |
| At discharge                      |                          |                        |                        |
| ADL independency (yes)            | 34                       | 3                      | 6                      |
| Wheel-chair use (yes)             | 4                        | 1                      | 0                      |
| <b>Health Professionals</b>       | Clinical visit<br>(n=10) | Focus group 3<br>(n=4) | Focus group 4<br>(n=4) |
| Age                               | 46 (35-63)               | 43 (37-46)             | 46 (35-55)             |
| Primary care, rural               |                          |                        | x                      |
| Specialized care, urban           |                          | x                      |                        |
| Sex, male                         | 3                        | 0                      | 1                      |
| Nurse/ OT/ Physician              | 4/1/5                    | 3/0/1                  | 0/1/3                  |
| Stroke experience (years)         |                          |                        |                        |
| ≤5/ 5-10/ 10                      | 2/2/6                    | 0/1/3                  | 2/1/1                  |

Abbreviations: NIHSS=National Institutes of Health Stroke Scale, ADL= Activities of Daily Living, OT= Occupational Therapist.

(Missing data from medical records (n=4).

## Feasibility of the PSC

Forty patients (87%) had one or more problems identified by the PSC (figure 2). ‘Life after stroke’ was most common (61%), followed by cognition (56%) and mood changes (41%). A median of four problem areas per patient (range, 0–9; interquartile range [IQR], 1–5) was identified; the median in specialised care was 3 (IQR, 1–5), and in primary care, it was 4 (IQR, 1–5). Only six (13%) patients reported no problems. Most patients (70%) acknowledged having received information about secondary prevention. Referrals were registered in eight cases, slightly more often in primary care (n=6) than in specialised care (n=2). The time taken to administer the PSC was  $\leq 15$  minutes for 52%,  $\leq 30$  minutes for 43%, and  $\geq 45$  minutes for 5%.

[Insert figure 2 near here]

Four focus groups were conducted, and their characteristics are shown in table 2. One woman dropped out because of a scheduled medical examination. The focus group discussions revealed that the PSC structure in combination with room for dialogue could support egalitarian follow-up and identification of needs. A main theme and three organisational themes emerged in these discussions (figure 3).

[Insert figure 3 near here]

## The content and relevance of the PSC

### *Item relevance*

The items included in the PSC were considered relevant to all groups. Because stroke affects persons differently, participants found it valuable that the PSC covers a broad spectrum of problems, although not all problems are relevant to every person with stroke.

### *The PSC ensures coverage of important areas, but excluded areas could be missed*

Both patients and HPs stated that some issues might be overlooked if not specifically stated in the PSC; such as nutrition, sexuality, and driving. The HPs discussed the appropriate amount of problem areas in the PSC. They wanted more areas yet preferred the checklist to be short and complemented by profession-specific assessments when needed. Some participants appreciated the recurring phrase “since your stroke”, but others preferred to hear/say it once at the beginning of the visit. Patients perceived the PSC as easy to understand, while HPs

1  
2  
3 expressed a concern about misunderstandings, especially for the items ‘secondary prevention’  
4 and ‘spasticity’.  
5  
6  
7

### 8 The PSC as a tool for dialogue 9

10 Patients and HPs both emphasised the need for dialogue to create mutual understanding. HPs  
11 described that knowledge and experience affected their ability to detect problems, while  
12 patients described differences in their ability to communicate problems.  
13  
14  
15

#### 16 *Dialogue facilitates patients in expressing needs and engenders feelings of being cared for*

17 Patients said that the PSC questions facilitated dialogue, leading to a greater likelihood that  
18 important areas would be elucidated and discussed. Memory problems, lack of initiative,  
19 fatigue, or being less talkative were mentioned as barriers to dialogue that the PSC could  
20 address. The PSC gave clear direction for the structure of the dialogue and accordingly  
21 facilitating identification of problems. Nevertheless, using the PSC in combination with  
22 dialogue was seen as important. Patients stated that they might need time for consideration  
23 before answering the PSC questions, time that was often not given within the limits of the  
24 visits.  
25  
26  
27  
28  
29  
30  
31  
32

33 Generally, participants thought patients should have the opportunity to talk to a  
34 professional about stroke-related concerns and stated that the PSC could facilitate this  
35 exchange. Patients expressed that the PSC covers areas centring on them as a person, which  
36 made them feel cared for. The understanding of the HPs was that relatives often  
37 complemented information concerning problems that patients might neglect or forget to  
38 mention:  
39  
40  
41  
42  
43  
44

45 *P4: “I think there is a great deal of importance to how much you are affected by the*  
46 *stroke. The more you are affected, the harder it is to think about the different facets of*  
47 *it” (the areas in the PSC). (Strongly agreed upon)*  
48  
49

50 (Group 1. Patients)  
51  
52

#### 53 *The importance of HPs’ competence in stroke and communication skills for capturing patient* 54 *needs* 55

56 To ensure that problems would be fully addressed, a professional’s competence in stroke was  
57 seen as key by the participants. HPs feared that lack of stroke competence might lead to  
58  
59  
60

1  
2  
3 problems going unrecognised. The PSC was seen as an asset as well as a barrier to dialogue.  
4 If too much focus was placed on posing the questions, participants experienced a decreased  
5 interaction. Sensitivity from the HPs and use of additional questions was seen as essential:  
6  
7  
8  
9

10 *P7: "No, there's only benefits, but it depends on how you use it, and if the staff*  
11 *think it is meaningful, so it's not just checked off. Rather that you have the*  
12 *opportunity to cover the things that each point is actually about".*

13  
14  
15 *P8: "Yeah, all the stuff that's crazy [difficulties after the stroke], follow up that*  
16 *stuff."*

17  
18  
19 *Moderator: "That you have time to follow up what is included in the point? Can*  
20 *you elaborate on that?"*

21  
22 *P7: "Yes, it's the topic this question is about, that you can elaborate on if you*  
23 *want to (...) the person with the checklist shouldn't be bound to it 100% and*  
24 *slavishly follow it, but understand signals from the patient and talk more*  
25 *broadly and connect it to the other things that depend upon it". (agreement)*

26  
27  
28 *P9: "Absolutely".*

29  
30  
31 *P7: "Otherwise, it just becomes mechanical; you can't be just like a computer*  
32 *asking questions".*

33  
34 (Group 2. Patients)  
35  
36

37  
38 There were conflicting opinions about how to apply the questions in the PSC. Experienced  
39 HPs preferred to use it as a supplement for memory within a free dialogue. In contrast,  
40 inexperienced HPs perceived the specific questions as good to assume and a basis for leading  
41 into other related concerns (i.g., fatigue):  
42  
43  
44  
45

46  
47 *P5: "It's more about if you think that you should use standardised things for*  
48 *everyone, even for primary healthcare/outpatient care, I don't think that really*  
49 *works".*

50  
51 *P6: "Exactly, that's the question, should you use the checklist just as it is, or*  
52 *should you use it for your own part and remember. That's the thing, because*  
53 *you can then approach each patient differently and get it all. But asking the*  
54 *exact same questions for each patient, I agree, that's really hard to do".*

55  
56  
57 (Group 3. HPs)  
58  
59  
60

## PSC as a systematic routine and a basis for egalitarian follow-up

### *The PSC as a shared knowledge base to be individualised for each patient*

The PSC was considered to increase knowledge about stroke and secure an egalitarian follow-up, especially for inexperienced HPs and patients with limited ability to express their needs. Even when the PSC was used, lack of stroke competence and limited knowledge about opportunities for referrals were perceived as an obstacle to egalitarian follow-up. One suggestion was to add local referral opportunities and access to scientific references in conjunction with the PSC. Factors such as comorbidities and time since stroke must be taken into account because they could affect responses to PSC items.

### *The PSC supports continuity and referrals but depends on available resources*

Participants addressed the need for regular follow-ups and considered the PSC to be a useful tool and basis for referrals. The use of the PSC was seen as a rapid way to cover the problem areas if only the questions were used, but when supplementary questions were needed, the time need also increased. One concern, especially among the physicians, was the time taken to administer the PSC in addition to their ordinary routines. HPs emphasised that the use of the PSC should be beneficial for the patients and in accordance with time limits and referral opportunities. Some considered it a bit rigid to go through all items if the patient experienced no problems, although it was observed that it could be completed quickly.

To enable preparation beforehand and make visits more time-efficient, a patient version of the PSC was proposed. Participants strongly emphasised that problems identified by the PSC should lead to appropriate intervention and not only an evaluation of current status:

*P11: "The risk is you might get a false sense of security though. So, someone has asked the question, and I have answered "yes" to this question; so I then expect something to happen".*

(agreement from the others)

*P11: "It's like, that's what decides the quality of what happens with the measures (...) It should end with me knowing how this information is taken and handled, what happens now. Not just that you do it and then that's great. (mumbles) Is it like statistics or what?"*

(Group 1. Patients)

Lack of opportunities for interventions as well as knowledge gaps were expressed by HPs as difficulties in meeting these expectations. A specific dimension of this problem was mentioned as leading to a risk of avoidance of discussing certain items.

Table 3. Evaluation of the use of Post-Stroke Checklist (PSC) based on satisfaction ratings (likert 1-5) by patients and health professionals.

| Satisfaction with:                        | Patients (n=46)<br>median (IQR) | Health professionals<br>(n=10) median (IQR) |
|-------------------------------------------|---------------------------------|---------------------------------------------|
| Overall assessment where PSC was used     | 5 (4-5)                         | 4 (3-4)                                     |
| Identification of needs                   | 5 (4-5)                         | -                                           |
| Identification of need (for each patient) | -                               | 3 (3-4)                                     |
| Confidence in receiving support           | 5 (4-5)                         | -                                           |
| Guidance for referrals and treatment      | -                               | 3 (2-4)                                     |

Abbreviations: IQR= interquartile range

By combining the results derived by different methods, additional aspects of the analysis can be demonstrated. The patients evaluated the satisfaction with the PSC as high (table 3). In addition, the focus group analyses gave insights into a wide range of factors that affect satisfaction, and its feasibility was exemplified by the importance of dialogue (figure 3). HP satisfaction with the PSC varied among patients (table 3). Participants perceived it as important to adapt the use of the PSC to individual aspects. Some differences regarding individual prerequisites are displayed in table 2, and others are mentioned in the qualitative analyses. HP stroke experience varied, especially in the primary care settings (table 2). In the focus group discussions, competence in stroke was perceived as important if subtle problems were to be properly recognised.

## DISCUSSION

The PSC is a relevant and feasible tool to identify patients who can benefit from targeted interventions, as noted by persons with stroke and HPs. The original purpose of the PSC was to be an easy-to-use tool to detect post-stroke problems, as well as a support for guiding referrals.<sup>11</sup> This study brings out an awareness about how follow-up through the PSC could be enhanced by user perceptions and suggested strategies. This knowledge could add important insights when implementing the PSC in line with the World Stroke Organization recommendations. The focus group discussions raised issues concerning prerequisites when



1  
2  
3 using the PSC. These include HP stroke competence, room for dialogue, and how the  
4 identified needs were addressed.  
5

6 The wide range of post-stroke problems identified in the present study demonstrated the  
7 relevance of the PSC, with a median of four problems per patient. Of note, reported problems  
8 on specific PSC items differ considerably; 'life after stroke', cognition, and continence vary  
9 when comparing among countries.<sup>12-14</sup> Based on issues raised in the focus group discussions,  
10 likely causes of these discrepancies in reported problems could be HP stroke competence,  
11 opportunity for a dialogue, and time limits on the administration of the PSC. Furthermore,  
12 cultural aspects, differences in healthcare systems, and follow-up services could affect the  
13 results. Nevertheless, the wide range of identified problems alongside participant perceptions  
14 in this study stresses the relevance of using the PSC in clinical practice. The long-term  
15 consequences after stroke emphasise the need for a comprehensive long-term follow-up with  
16 a multi-domain approach.<sup>13 21-23</sup>  
17

18 The present study provides a deeper understanding of how the PSC structure could  
19 support patients in expressing their needs. Problems with communication and comprehension  
20 are common after stroke,<sup>5</sup> which influences decision-making during follow-up. Participation  
21 in decision-making requires health literacy, i.e., the competence to understand information  
22 and a capacity to argue for one's needs in relation to appropriate interventions.<sup>7</sup> In this study,  
23 despite perceptions that the PSC questions were easy to understand, dialogue was found to be  
24 crucial. Participants raised concerns about problem areas that could be missed depending on  
25 how the PSC was used. Results from using the PSC in the UK and Singapore<sup>12</sup> indicate that  
26 several problem areas could be indirectly identified. Awareness of the complexity of need  
27 identification underscores the role of the HP when using the PSC. Even if no unmet need is  
28 reported, a person can still identify as living with residual impairments and perceived  
29 problems in engaging in activities.<sup>24</sup> Participants expressed that identification of needs could  
30 be enhanced if more time were allowed for consideration of these needs and for additional  
31 questions; another help would be the opportunity to fill in the PSC beforehand. Current  
32 findings stress HP stroke competence and the need to make space for dialogue when  
33 administering the PSC to support needs identification and decision-making.  
34  
35  
36  
37  
38  
39  
40  
41  
42  
43  
44  
45  
46  
47  
48  
49  
50  
51  
52

53 The results from the present study highlight the dialogue between the patient and HP,  
54 which is central in health care.<sup>9 10 25</sup> Experienced HPs argued that they could cover most  
55 topics using open-ended questions. In contrast, others emphasised the value of articulating the  
56 PSC questions literally. To enable investigation of specific areas, closed questions can be  
57 important<sup>26</sup> and facilitate situations involving patients with communication difficulties.  
58  
59  
60



1  
2  
3 However, the PSC instructions do not hinder its use in a looser way as long as all areas are  
4 captured. The result shows that patients can benefit from a clear structure when the PSC is  
5 used. Participants in all focus groups agreed on the benefits of going through the areas in the  
6 PSC in a way that ensures identification of unmet needs. In addition, using the PSC in  
7 combination with dialogue supports the patients' capacity to communicate their needs. A  
8 narrative communication, along with signs of problems, gives the HP a foundation for  
9 planning care together with the patient and creates conditions for patients to make appropriate  
10 health decisions.<sup>10</sup> The importance of clarifying the prerequisites for follow-up, as well as  
11 creating a plan to take care of identified needs, was noted in the focus group discussions.  
12  
13  
14  
15  
16  
17  
18  
19

### 20 **Strengths and limitations**

21 A strength of this study is that patients were partners throughout the project, from the  
22 translation process to participation in the focus group discussions. In addition, the mix of  
23 methods made it possible to explore the feasibility of the PSC at different levels compared to  
24 previous research. Few persons in this population had lived with their stroke for a long time,  
25 and only one of them had a severe stroke, which might have affected which problems were  
26 identified. This naturalistic design in an ordinary outpatient context, however, is  
27 representative of the Swedish population, where the majority have mild stroke. The time (1-2  
28 months) between the follow-up visit where the PSC was used and the focus group discussion  
29 could be a risk for recall bias. However, the focus group methodology enabled exploring a  
30 range of opinions of people across groups, and together, the participants contributed to rich  
31 discussions. A strength of the study is the heterogeneous sample from different outpatient  
32 settings, with patients having a range of ages, stroke characteristics, and education levels, and  
33 HPs with a range of professional roles and experience in stroke. To strengthen the  
34 transferability of the findings, a comprehensive description of the study context, participant  
35 characteristics, data collection, and analysis process are included in the methods section.  
36 Because the World Stroke Organization recommends using the PSC globally, these results  
37 contribute to a deeper understanding of its feasibility that can be transferable to other  
38 countries, although consideration must be given to cultural and contextual factors.  
39  
40  
41  
42  
43  
44  
45  
46  
47  
48  
49  
50  
51  
52  
53  
54

### 55 **Conclusions**

56 The PSC is a feasible and relevant tool to support egalitarian follow-up and identify patients  
57 who can benefit from targeted interventions after stroke. Stroke competence, room for  
58 dialogue, and addressing identified needs were raised as important issues to consider when  
59  
60

1  
2  
3 using the PSC. The PSC can facilitate patients in expressing their needs, enhancing their  
4 ability to participate in decision-making.  
5  
6  
7

### 8 **Acknowledgements**

9  
10 The authors thank the health professionals and patients, for sharing their experiences. The  
11 authors also thank Dr Kate Bramley-Moore for editing and translation help.  
12  
13  
14

### 15 **Author contribution**

16  
17 EK, ÅL-N, and KSS contributed to the design of the study. EK conducted the interviews and analyzed  
18 the data together with GC, involving KSS and ÅL-N in the final stages of the analysis. EK wrote the  
19 first version of the manuscript, which was reviewed by GC, ÅL-N KSS. All four authors contributed  
20 to and approved the final manuscript.  
21  
22  
23

### 24 **Funding**

25  
26 The study was supported by grants from the Swedish state under the agreement between the  
27 Swedish government and the county councils, the ALF agreement (ALFGBG-718711); the  
28 Swedish Stroke Association; the Local Research and Development Board for Gothenburg and  
29 Södra Bohuslän; the Swedish Heart and Lung foundation; the Swedish Brain Foundation; an  
30 unconditional grant from Allergan; the Hjalmar Svenssons Foundation; Neurological  
31 Foundation; Rune and Ulla Amlövs Foundation; Per-Olof Ahls Foundation; and John and Brit  
32 Wennerströms Foundation.  
33  
34  
35  
36  
37

### 38 **Competing interests**

39  
40 None declared.  
41  
42

### 43 **Data sharing**

44  
45 Due to ethical restrictions, data are available upon request. Researchers can submit requests for data to  
46 the authors (contact: ks.sunnerhagen@neuro.gu.se). Complete data from interviews cannot be made  
47 publicly available for ethical and legal reasons, according to the Swedish regulations  
48 <http://www.epn.se/en/start/regulations/>. Public availability would compromise participant privacy or  
49 confidentiality. Upon request a list of condensed meaning units or codes can be made available after  
50 removal of information that may risk the confidentiality of the participants. To access data please  
51 contact the first author: (emma.kjork@neuro.gu.se).  
52  
53  
54  
55  
56  
57  
58  
59  
60

**REFERENCES**

1. Crichton SL, Bray BD, McKeivitt C, et al. Patient outcomes up to 15 years after stroke: survival, disability, quality of life, cognition and mental health. *J Neurol Neurosurg Psychiatry* 2016;87(10):1091-8. doi: 10.1136/jnnp-2016-313361
2. Ullberg T, Zia E, Petersson J, et al. Changes in functional outcome over the first year after stroke: an observational study from the Swedish stroke register. *Stroke* 2015;46(2):389-94. doi: 10.1161/STROKEAHA.114.006538
3. Ullberg T, Zia E, Petersson J, et al. Perceived Unmet Rehabilitation Needs 1 Year After Stroke: An Observational Study From the Swedish Stroke Register. *Stroke* 2016;47(2):539-41. doi: 10.1161/STROKEAHA.115.011670
4. Carlsson GE, Moller A, Blomstrand C. Consequences of mild stroke in persons <75 years - a 1-year follow-up. *Cerebrovasc Dis* 2003;16(4):383-8. doi: 10.1159/000072561
5. Cumming TB, Marshall RS, Lazar RM. Stroke, cognitive deficits, and rehabilitation: still an incomplete picture. *Int J Stroke* 2013;8(1):38-45. doi: 10.1111/j.1747-4949.2012.00972.x
6. Levasseur M, Carrier A. Integrating health literacy into occupational therapy: Findings from a scoping review. *Scand J Occup Ther* 2012;19(4):305-14. doi: 10.3109/11038128.2011.588724
7. Mackey LM, Doody C, Werner EL, et al. Self-Management Skills in Chronic Disease Management: What Role Does Health Literacy Have? *Med Decis Making* 2016;36(6):741-59. doi: 10.1177/0272989X16638330 [published Online First: 2016/04/08]
8. Kirkevold M. The unfolding illness trajectory of stroke. *Disabil Rehabil* 2002;24(17):887-98. doi: 10.1080/09638280210142239
9. Tistad M, Ytterberg C, Tham K, et al. Poor concurrence between disabilities as described by patients and established assessment tools three months after stroke: a mixed methods approach. *J Neurol Sci* 2012;313(1-2):160-6. doi: 10.1016/j.jns.2011.08.038 [published Online First: 2011/09/23]
10. Ekman I, Swedberg K, Taft C, et al. Person-centered care—Ready for prime time. *Eur J Cardiovasc Nurs* 2011;10(4):248-51.
11. Philp I, Brainin M, Walker MF, et al. Development of a poststroke checklist to standardize follow-up care for stroke survivors. *J Stroke Cerebrovasc Dis* 2013;22(7):e173-80. doi: 10.1016/j.jstrokecerebrovasdis.2012.10.016

12. Ward AB, Chen C, Norrving B, et al. Evaluation of the Post Stroke Checklist: a pilot study in the United Kingdom and Singapore. *Int J Stroke* 2014;9 Suppl A100(A100):76-84. doi: 10.1111/ijss.12291
13. Iosa M, Lupo A, Morone G, et al. Post Soft Care: Italian implementation of a post-stroke checklist software for primary care and identification of unmet needs in community-dwelling patients. *Neurol Sci* 2017;39(1):135-39. doi: 10.1007/s10072-017-3140-1
14. Hotter B, Padberg I, Liebenau A, et al. Identifying unmet needs in long-term stroke care using in-depth assessment and the Post-Stroke Checklist – The Managing Aftercare for Stroke (MAS-I) study. *European Stroke Journal* 2018;3(3):237-45. doi: 10.1177/2396987318771174
15. Krueger RA. Focus groups: A practical guide for applied research. 5th ed. London: Sage publications 2014.
16. Ivanoff SD, Hultberg J. Understanding the multiple realities of everyday life: basic assumptions in focus-group methodology. *Scand J Occup Ther* 2006;13(2):125-32.
17. Craig P, Dieppe P, Macintyre S, et al. Developing and evaluating complex interventions: the new Medical Research Council guidance. *BMJ* 2008;337:a1655. doi: 10.1136/bmj.a1655
18. Beaton DE, Bombardier C, Guillemin F, et al. Guidelines for the process of cross-cultural adaptation of self-report measures. *Spine (Phila Pa 1976)* 2000;25(24):3186-91. [published Online First: 2000/12/22]
19. Tong A, Sainsbury P, Craig J. Consolidated criteria for reporting qualitative research (COREQ): a 32-item checklist for interviews and focus groups. *Int J Qual Health Care* 2007;19(6)
20. Malterud K, Siersma VD, Guassora AD. Sample Size in Qualitative Interview Studies: Guided by Information Power. *Qual Health Res* 2015 doi: 10.1177/1049732315617444 [published Online First: 2015/11/29]
21. Paul SL, Srikanth VK, Thrift AG. The large and growing burden of stroke. *Curr Drug Targets* 2007;8(7):786-93. [published Online First: 2007/07/17]
22. Stevens E, Emmett E, Wang DY, et al. The Burden Of Stroke In Europe Report London: SAFE Stroke Alliance For Europe 2017.
23. Norrving B, Barrick J, Davalos A, et al. Action Plan for Stroke in Europe 2018–2030. *European Stroke Journal*;0(0):2396987318808719. doi: 10.1177/2396987318808719

- 1  
2  
3 24. Shannon RL, Forster A, Hawkins RJ. A qualitative exploration of self-reported unmet  
4 need one year after stroke. *Disabil Rehabil* 2016;38(20):2000-7. doi:  
5 10.3109/09638288.2015.1107784  
6  
7  
8 25. Williams MV, Davis T, Parker RM, et al. The role of health literacy in patient-physician  
9 communication. *Fam Med* 2002;34(5):383-9.  
10  
11 26. Silverman J, Kurtz S, Draper J. Skills for communicating with patients. 3rd ed. London:  
12 CRC Press 2016.  
13  
14  
15  
16  
17  
18  
19  
20  
21  
22  
23  
24  
25  
26  
27  
28  
29  
30  
31  
32  
33  
34  
35  
36  
37  
38  
39  
40  
41  
42  
43  
44  
45  
46  
47  
48  
49  
50  
51  
52  
53  
54  
55  
56  
57  
58  
59  
60

For peer review only

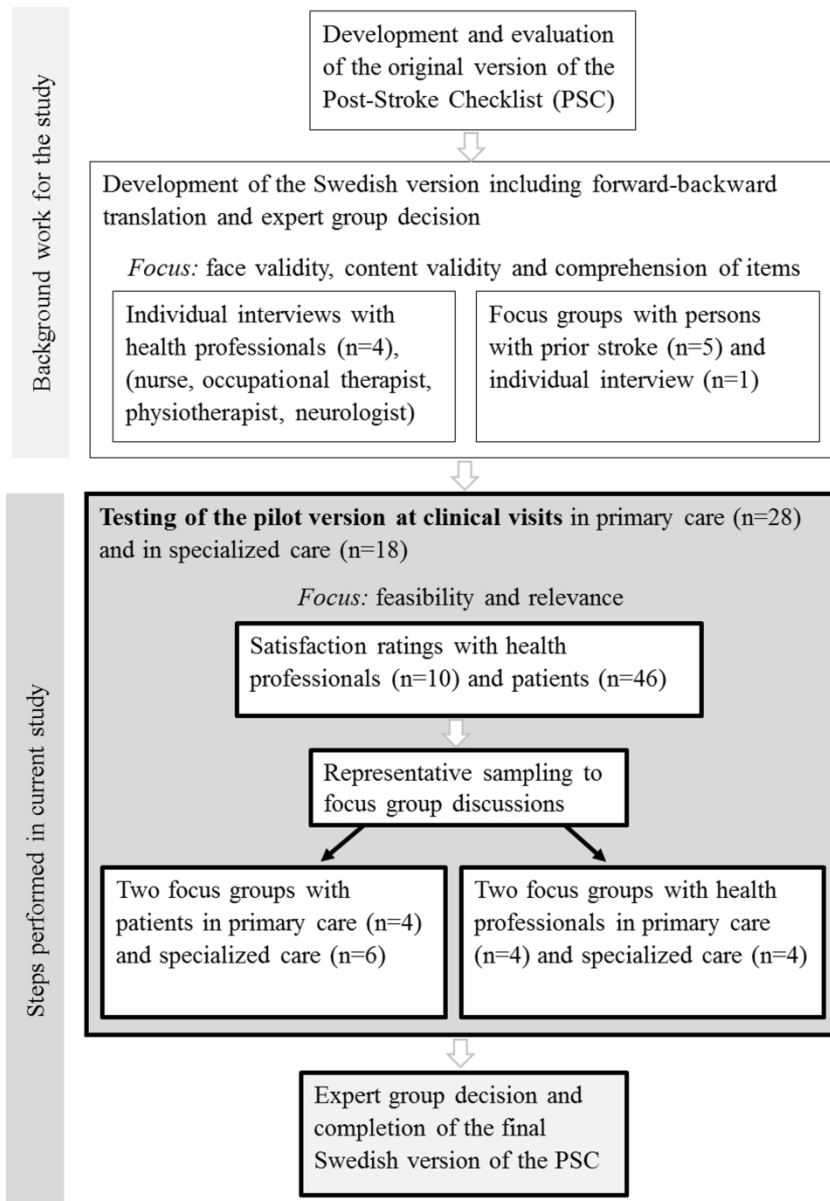

Figure 1. The steps included in the validation and cross-cultural adaptation of the Swedish version of the PSC including background work and current study.

199x267mm (300 x 300 DPI)

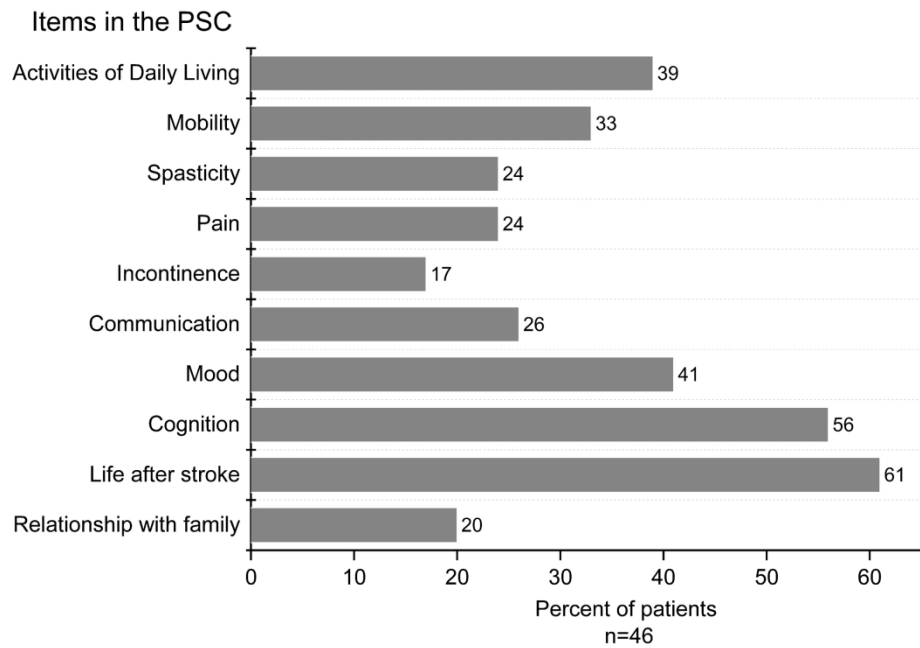

Figure 2. Percentages of patients with identified problems in each Post-Stroke Checklist item (n=46).

229x160mm (300 x 300 DPI)

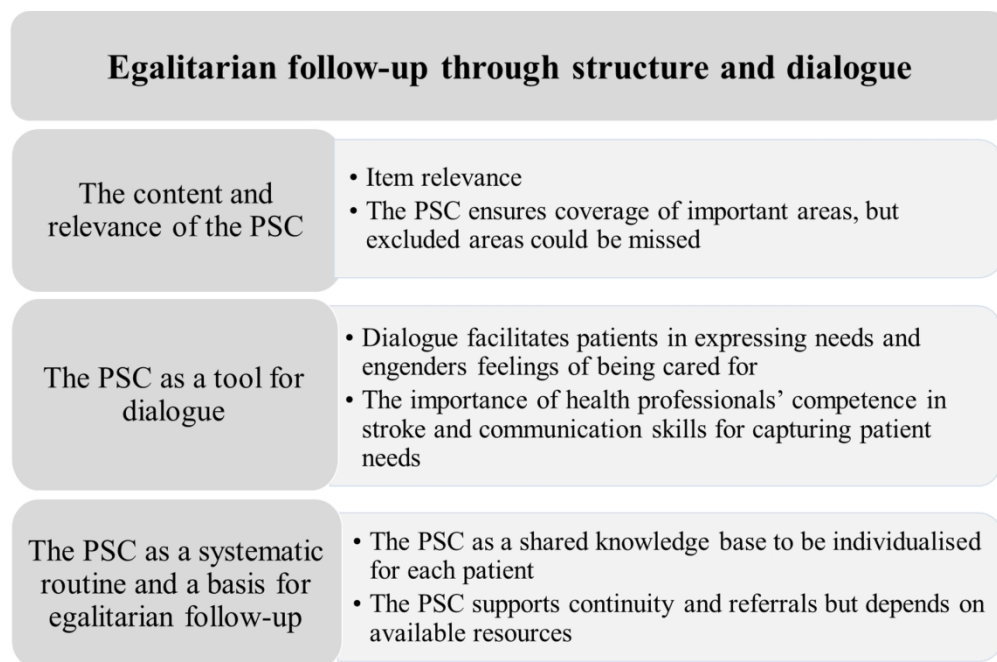

28 Figure 3. Themes and subthemes derived from the focusgroup discussions with patients and health  
29 professionals regarding experiences of using the Post-Stroke Checklist.

30 170x112mm (300 x 300 DPI)



## Appendix 2 - COREQ 32-item checklist

| No. Item                                       | Guide questions/description                                  | Comments                                                                                                         |
|------------------------------------------------|--------------------------------------------------------------|------------------------------------------------------------------------------------------------------------------|
| <b>Domain 1: Research team and reflexivity</b> |                                                              |                                                                                                                  |
| <i>Personal characteristics</i>                |                                                              |                                                                                                                  |
| 1. Interviewer/facilitator                     | Which author/s conducted the interview?                      | EK (p.6)                                                                                                         |
| 2. Credentials                                 | What were the researcher's credentials? <i>e.g., PhD, MD</i> | 3 Occupational Therapists (1 associate professor, 1 PhD, and 1 MS, PhD student)<br>1 Medical doctor, (Professor) |
| 3. Occupation                                  | What was their occupation at the time of the study?          | Researchers                                                                                                      |
| 4. Gender                                      | Was the researcher male or female?                           | 4 female (p. 6-7)                                                                                                |
| 5. Experience and training                     | What experience or training did the researchers have?        | > 20 years in stroke rehab, Qualitative research (p. 7)                                                          |
| <i>Relationship with participants</i>          |                                                              |                                                                                                                  |

|                                             |                                                                                                                                                                 |                                                                                                      |
|---------------------------------------------|-----------------------------------------------------------------------------------------------------------------------------------------------------------------|------------------------------------------------------------------------------------------------------|
| 6. Relationship established                 | Was a relationship established prior to study commencement?                                                                                                     | The moderator had met some of the health professionals in work related situations.                   |
| 7. Participant knowledge of the interviewer | What did the participants know about the researcher? <i>e.g., personal goals, reasons for doing the research</i>                                                | Broad outlines given                                                                                 |
| 8. Interviewer characteristics              | What characteristics were reported about the interviewer/facilitator?<br><i>E.g., bias, assumptions, reasons and interests in the research topic</i>            | (p. 5)                                                                                               |
| <b>Domain 2: study design</b>               |                                                                                                                                                                 |                                                                                                      |
| <i>Theoretical framework</i>                |                                                                                                                                                                 |                                                                                                      |
| 9. Methodological orientation and Theory    | What methodological orientation was stated to underpin the study? <i>e.g. grounded theory, discourse analysis, ethnography, phenomenology, content analysis</i> | Focus group according to Kreuger, underpinned by a methodology based on Social constructivism (p. 4) |
| <i>Participant selection</i>                |                                                                                                                                                                 |                                                                                                      |

|                                  |                                                                                           |                                                                                 |
|----------------------------------|-------------------------------------------------------------------------------------------|---------------------------------------------------------------------------------|
| 10. Sampling                     | How were participants selected? <i>e.g. purposive, convenience, consecutive, snowball</i> | Purposive (p. 5)                                                                |
| 11. Method of approach           | How were participants approached? <i>e.g. face-to-face, telephone, mail, email</i>        | Face to face and by telephone (p. 5)                                            |
| 12. Sample size                  | How many participants were in the study?                                                  | In total, 18 (patients/HPs) participated in the focus groups (see table 2, p 7) |
| 13. Non-participation            | How many people refused to participate or dropped out? Reasons?                           | One dropped out because of a scheduled medical examination (p. 9)               |
| <i>Setting</i>                   |                                                                                           |                                                                                 |
| 14. Setting of data collection   | Where was the data collected? <i>e.g. home, clinic, workplace</i>                         | Clinical setting (p. 5)                                                         |
| 15. Presence of non-participants | Was anyone else present besides the participants and researchers?                         | No (p. 6)                                                                       |
| 16. Description of sample        | What are the important characteristics of the sample? <i>e.g. demographic data, date</i>  | People with stroke in a late phase of stroke recovery (p. 7, table 2)           |
| <i>Data collection</i>           |                                                                                           |                                                                                 |

|                                        |                                                                               |                                                                                |
|----------------------------------------|-------------------------------------------------------------------------------|--------------------------------------------------------------------------------|
| 17. Interview guide                    | Were questions, prompts, guides provided by the authors? Was it pilot tested? | A interview guide was provided (p.6).<br>A pilot testing was conducted (p. 5). |
| 18. Repeat interviews                  | Were repeat interviews carried out?                                           | No, each group met once (p. 6)                                                 |
| 19. Audio/visual recording             | Did the researchers use audio or visual recording to collect the data?        | Audio (p. 6 )                                                                  |
| 20. Field notes                        | Were field notes made during and/or after the interview or focus group?       | Yes                                                                            |
| 21. Duration                           | What was the duration of the interviews or focus group?                       | Approximately 1.5 hours (p. 6 )                                                |
| 22 Data saturation                     | Was data saturation discussed?                                                | Yes (p. 6)                                                                     |
| 23. Transcripts returned               | Were transcripts returned to participants for comment and/or correction?      | No                                                                             |
| <b>Domain 3: analysis and findings</b> |                                                                               |                                                                                |
| <i>Data analysis</i>                   |                                                                               |                                                                                |
| 24. Number of data coders              | How many data coders coded the data?                                          | Two (EK and GC) (p. 6 )                                                        |
| 25. Description of the coding tree     | Did authors provide a description of the coding tree?                         | Yes.                                                                           |
| 26. Derivation of themes               | Were themes identified in advance or derived from the data?                   | Derived from the data (p. 6)                                                   |

|                                  |                                                                                                                                        |                                                         |
|----------------------------------|----------------------------------------------------------------------------------------------------------------------------------------|---------------------------------------------------------|
| 27. Software                     | What software, if applicable, was used to manage the data?                                                                             | Nvivo (p. 6)                                            |
| 28. Participant checking         | Did participants provide feedback on the findings?                                                                                     | No, not specifically, but a general presentation (p. 5) |
| <i>Reporting</i>                 |                                                                                                                                        |                                                         |
| 29. Quotations presented         | Were participant quotations presented to illustrate the themes/findings? Was each quotation identified? <i>e.g. participant number</i> | Yes (Results)                                           |
| 30. Data and findings consistent | Was there consistency between the data presented and the findings?                                                                     | Yes (Results and Discussion)                            |
| 31. Clarity of major themes      | Were major themes clearly presented in the findings?                                                                                   | Yes (Figure 3 and results)                              |
| 32. Clarity of minor themes      | Is there a description of diverse cases or discussion of minor themes?                                                                 | Yes (Results and Discussion)                            |

# BMJ Open

## Experiences using the Post-Stroke Checklist in Sweden with a focus on feasibility and relevance: a mixed-method design

|                                 |                                                                                                                                                                                                                                                                                                                                                                                                                                                                                                                        |
|---------------------------------|------------------------------------------------------------------------------------------------------------------------------------------------------------------------------------------------------------------------------------------------------------------------------------------------------------------------------------------------------------------------------------------------------------------------------------------------------------------------------------------------------------------------|
| Journal:                        | <i>BMJ Open</i>                                                                                                                                                                                                                                                                                                                                                                                                                                                                                                        |
| Manuscript ID                   | bmjopen-2018-028218.R1                                                                                                                                                                                                                                                                                                                                                                                                                                                                                                 |
| Article Type:                   | Research                                                                                                                                                                                                                                                                                                                                                                                                                                                                                                               |
| Date Submitted by the Author:   | 28-Jan-2019                                                                                                                                                                                                                                                                                                                                                                                                                                                                                                            |
| Complete List of Authors:       | Kjörk, Emma K; University of Gothenburg, Institute of Neuroscience and Physiology, Department of Clinical Neuroscience<br>Carlsson, Gunnel; University of Gothenburg, Institute of Neuroscience and Physiology, Department of Clinical Neuroscience<br>Sunnerhagen, Katharina; University of Gothenburg, Institute of Neuroscience and Physiology, Department of Clinical Neuroscience<br>Lundgren-Nilsson, Asa; Gothenburg University, Institute of Neuroscience and Physiology, Department och Clinical Neuroscience |
| <b>Primary Subject Heading</b>: | Cardiovascular medicine                                                                                                                                                                                                                                                                                                                                                                                                                                                                                                |
| Secondary Subject Heading:      | Evidence based practice, Health services research, Rehabilitation medicine                                                                                                                                                                                                                                                                                                                                                                                                                                             |
| Keywords:                       | long-term care, Feasibility, Focus groups, Follow-up, Standard of Care, Stroke < NEUROLOGY                                                                                                                                                                                                                                                                                                                                                                                                                             |
|                                 |                                                                                                                                                                                                                                                                                                                                                                                                                                                                                                                        |

SCHOLARONE™  
Manuscripts

# Experiences using the Post-Stroke Checklist in Sweden with a focus on feasibility and relevance: a mixed-method design

Emma K Kjörk\* OT, MS<sup>1,2</sup>, Gunnel Carlsson OT, PhD<sup>1</sup>, Katharina S Sunnerhagen MD, PhD, Prof<sup>1</sup> and Åsa Lundgren-Nilsson OT, PhD<sup>1</sup>

<sup>1</sup>Institute of Neuroscience and Physiology, Dep of Clinical Neuroscience, Sahlgrenska Academy at University of Gothenburg, Gothenburg, Sweden

<sup>2</sup>Department of Occupational Therapy and Physiotherapy, Sahlgrenska University Hospital, Gothenburg, Sweden

## \* Corresponding author:

Emma K Kjörk

Email address: [emma.kjork@neuro.gu.se](mailto:emma.kjork@neuro.gu.se)

Telephone: +46313422803

Postal address:

Institute of Neuroscience and Physiology

Dep of Clinical Neuroscience, Rehabilitation medicine

Per Dubbsgatan 14, fl. 3, 413 45 Gothenburg, Sweden

Word count Abstract: 300 words

Word count Main manuscript: 3991 words

Number of tables: 3

Number of figures: 3

# Experiences using the Post-Stroke Checklist in Sweden with a focus on feasibility and relevance: a mixed-method design

## ABSTRACT

**Objective** The wide range of outcomes after stroke emphasises the need for comprehensive long-term follow-up. The aim was to evaluate how people with stroke and health professionals (HPs') perceive the use of the Post-Stroke Checklist (PSC), with a focus on feasibility and relevance.

**Design** An exploratory design with a mix of qualitative and quantitative methods.

**Setting** Outpatient care at a university hospital and primary care centres in western Sweden.

**Participants** Forty-six consecutive patients (median age, 70; range, 41–85; 13 women) and ten health professionals (median age 46; range, 35–63; 7 women).

**Results** Most patients (87%) had one or more problems identified by the PSC. The most common problem areas were life after stroke (61%), cognition (56%), mood (41%), and activities of daily living (39%). Three organisational themes emerged from the focus group discussions. The perception of *the content and relevance of the PSC* was that common post-stroke problems were covered but that unmet needs still could be missed. Identifying needs was facilitated when using the *PSC as a tool for dialogue*. The dialogue between the patient and HP as well as HPs stroke expertise was perceived as important. The PSC was seen as *a systematic routine and a base for egalitarian follow-up*, but participants stressed consideration given to each individual. Addressing identified needs and meeting patient expectations were described as challenging given available healthcare services.

**Conclusions** The PSC is a feasible and relevant tool to support egalitarian follow-up and identify patients who could benefit from targeted post-stroke interventions. Stroke expertise, room for dialogue, and caring for identified needs emerged as important issues to consider when using the PSC. Nutrition, sexuality and fatigue were areas mentioned that might need to be addressed within the discussions. The PSC can facilitate patients in expressing their needs, enhancing their ability to participate in decision-making.



1  
2  
3 **Keywords** Stroke, Rehabilitation, Standard of care, Feasibility, Focus groups, Follow-up  
4  
5

6  
7 **Strengths and limitations (bullet points)**  
8

- 9
- 10 • A strength of this study is having patients as partners throughout the project, from the  
11 translation process to participation in the focus groups.  
12
  - 13
  - 14 • The mix of methods made it possible to explore the feasibility of the PSC from  
15 different perspectives and at different levels compared to previous research.  
16
  - 17
  - 18
  - 19 • A limitation is the lack of data collected from people with severe stroke, although this  
20 lack is typical of this naturalistic design and representative for the Swedish stroke  
21 population.  
22
  - 23
  - 24
  - 25
  - 26 • A study strength is the heterogeneous population from different outpatient settings,  
27 including a range of ages, stroke characteristics, and education levels, and health  
28 professionals with a range of experience in stroke care.  
29
  - 30
  - 31
  - 32
  - 33 • The study was conducted in a Swedish context, and the transferability of the findings  
34 in other cultural contexts is not known.  
35  
36  
37  
38  
39  
40  
41  
42  
43  
44  
45  
46  
47  
48  
49  
50  
51  
52  
53  
54  
55  
56  
57  
58  
59  
60

## INTRODUCTION

Post-stroke impairments often have long-term negative consequences for social relationships, dependence in daily life, and quality of life.<sup>1</sup> Perceived unfulfilled rehabilitation needs and changes in functioning during the first year after stroke<sup>2,3</sup> indicate the need for systematic long-term follow-up. Furthermore, a subtle decline in cognition as well as emotional problems<sup>4,5</sup> can easily be overlooked, leading to difficulty in accessing healthcare services.<sup>6,7</sup>

The adaptation process after stroke is long. In later phases, the focus changes from the stroke itself to more familiar aspects of daily life,<sup>8</sup> which may not be sufficiently targeted in current practice. Concordance is poor between perceived problems and problems detected by standardised assessments. Accordingly, dialogue should complement assessments to ensure that health services are based on patient needs,<sup>9</sup> in line with a person-centred approach.<sup>10</sup>

The Post-Stroke Checklist (PSC)<sup>11</sup> was developed to identify long-term care needs and facilitate referrals.<sup>11,12</sup> Although the PSC has been found to be feasible and useful,<sup>12-14</sup> knowledge is lacking about the perspectives of patients and health professionals (HPs) regarding its use in the Swedish health care context. The aim of this study was to evaluate how people with stroke and HPs perceive the use of the PSC, with a focus on feasibility and relevance.

## METHODS

### Study design

The study has an exploratory design. To capture the feasibility of using the PSC, we combined it with a satisfaction questionnaire and focus group discussions,<sup>15,16</sup> in line with guidelines for complex interventions.<sup>17</sup> This study is part of a validation and cultural adaptation process<sup>18</sup> of the PSC in Sweden (figure 1). By combining data collection methods, we expected to gain a deeper understanding of using the PSC as a tool to structure follow-up. The underpinning methodology in the focus groups is based on social constructivism.<sup>16</sup> Consolidated criteria for reporting qualitative research (i.e., COREQ guidelines)<sup>19</sup> were followed for reporting qualitative data.

[Insert figure 1 near here]

## Patient and public involvement

This study explores how people with stroke experience the PSC. People from the Swedish Stroke Association (patient association) were involved in the translation process, the pilot testing of the interview guide, and focus group discussions and have been given a presentation of preliminary results.

## Participants

Participants were consecutively recruited while at a clinical visit in primary care or stroke specialised outpatient care at a university hospital, February 2015 to October 2015. The inclusion criterion was having had a stroke, regardless of the time of onset. The number of patients included was in accordance with a previous study<sup>12</sup> and principles for cross-cultural adaptation suggesting approximately 40.<sup>18</sup> Patients were excluded if cognitive impairment or insufficient knowledge of Swedish would have made the response to the PSC items unreliable. HPs from different clinics were invited to participate and selected to represent different professions. A purposive sampling was used with the attempt to achieve heterogeneity and homogeneity in the focus groups.<sup>15 16</sup> Written informed consent was obtained from all participants, and the regional ethical review board in Gothenburg approved the study (no. 521-14).

## Data collection

The PSC<sup>11</sup> has 11 items and is intended to identify post-stroke problems. It was developed by a multi-professional group of stroke experts, according to a Delphi process. Problem areas were chosen for having the greatest impact on patient quality of life that could be addressed with evidence-based interventions. The PSC includes secondary prevention, activities of daily living (ADLs), mobility, spasticity, pain, incontinence, communication, mood, cognition, life after stroke, and relationship with family. A response scale includes 'yes' and 'no' and recommended referrals adjacent to each problem area.<sup>11</sup>

Data collection was conducted in outpatient clinical facilities in two steps. For step 1, the HP administered the PSC to patients at a regular clinical visit (proxy responses were allowed). No additional training was given beyond the general instructions on the PSC. Participants were asked to reflect on the usefulness of the PSC as the basis for focus group discussions. Patients and HPs assessed satisfaction with the PSC after each visit through a satisfaction questionnaire with questions analogous to those used in a previous study.<sup>12</sup> The answers were rated on a Likert scale of 1–5, where 1 indicated not satisfied and 5 completely

1  
2  
3 satisfied. To ensure anonymity, patient responses were collected in an envelope. Demographic  
4 data (time since index stroke, age, sex), time to administration of the PSC, and HP profession  
5 were registered. In addition, if any referrals were made it was registered as yes/no for each  
6 patient without specification of what kind of referrals or standardised "actions" to be taken. Of  
7 the patients who gave informed consent, additional patient characteristics (such as type of  
8 stroke, aphasia, ADL dependency) were collected retrospectively from their medical records.  
9

10  
11 For step 2, the staff invited all participants during the follow-up to join in a focus group  
12 discussion. A set time of approximately 1-2 months was given between the visit and the focus  
13 group discussions. The first author (EK) telephoned participants willing to participate and sent  
14 them the study information letter, time for appointment, and a copy of the PSC. In total, four  
15 focus groups were conducted using a question guide.<sup>15</sup> Each focus group met once for  
16 approximately 1.5 hours. The meeting was recorded and transcribed verbatim. Initially in the  
17 focus groups, the importance of bringing up different opinions was emphasised. At the end, an  
18 oral overview was presented to ensure that participant contributions were as they intended.  
19  
20  
21  
22  
23  
24  
25  
26  
27  
28

### 29 **Data analysis**

30 Data gathered from PSC items, questionnaires, and demographic information were analysed  
31 using descriptive statistics with Statistical Package for the Social Sciences version 24. Data  
32 gathered from focus groups were analysed following Kreuger.<sup>15</sup> The aim of the analysis  
33 process was to describe the participants' perceptions and experiences based on the aim of the  
34 study.  
35  
36  
37  
38

39 Immediately after each focus group discussion, a written summary was created. The  
40 transcripts were coded using the computer software NVivo. First, the transcripts were read in  
41 their entirety to allow familiarity with the content as a whole, and discussions relevant to the  
42 aim were identified. Second, transcripts were systematised into categories based on  
43 similarities and differences in the discussions. Third, a descriptive summary was made for  
44 each category, adhering as closely as possible to the content of the raw data. Finally, these  
45 summaries in combination with selected quotes served as the basis for the interpretation and  
46 presented a deeper insight into the findings. In the analysis process, identified patterns were  
47 compared and contrasted across all four groups, resulting in an overarching thematic structure  
48 (for examples of the coding tree and themes see table 1). Quotations that showed the ongoing  
49 discussions<sup>16</sup> were selected to illuminate the results. Based on sampling strategies<sup>20</sup> and when  
50 similar discussions recurred in all groups<sup>15</sup>, data gathering stopped.  
51  
52  
53  
54  
55  
56  
57  
58  
59  
60

The first author (PhD student, OT, woman) was the moderator and performed most of the analysis. Multiple coding, continuous interpretation of data, and discussion of the emerging themes were completed together with the second author (PhD, OT, woman) to ensure accuracy of the analysis. The first author had knowledge about the study topic and the second author in qualitative methods. Both have conducted interviews previously. The third author (PhD, MD, woman) and last author (PhD, OT, woman) contributed with knowledge concerning revising and refining the themes. All authors have at least 20 years of experience in stroke rehabilitation.

Table 1. Examples illustrating the coding tree.

| Quote                                                                                                                                                                                                                                                                                                                                                                         | Code                                                                        | Subtheme                                                                                          |
|-------------------------------------------------------------------------------------------------------------------------------------------------------------------------------------------------------------------------------------------------------------------------------------------------------------------------------------------------------------------------------|-----------------------------------------------------------------------------|---------------------------------------------------------------------------------------------------|
| P4: "It has a lot to do with the competence of the person who's asking the questions so they can do the thinking to squeeze it all in"<br>(Group 1 Patients)                                                                                                                                                                                                                  | The professionals' expertise and reasoning                                  | The importance of HPs' with stroke expertise and communication skills for capturing patient needs |
| P2: "So, I think it has just been positive, and it is also done so quickly".<br>P1: "That's also a positive".<br>P2: "Yeah, it's fast, but you can also develop it as much as you want. But asking the questions doesn't take too long".<br>Moderator: "Is it quick?"<br>P1: "Yes. It also depends on what answers you get".<br>P2: "Yes".<br>(Group 4. Health professionals) | The administration of the PSC can be adapted, quickly done or more in-depth | The PSC supports continuity and referrals but depends on available resources                      |

## RESULTS

### Study group

The PSC was used in connection with a clinical visit in 46 patients. All patients lived in their homes. Most of them (65%) had experienced a stroke within 3 months at enrolment. The median time for hospitalisation was 8 days. Stroke severity at stroke onset was mild, with a

median of 2 according to National Institutes of Health Stroke Scale. Table 2 shows the characteristics of the participants and the focus groups.

Table 2. Characteristics of patients and health professionals in the clinical outpatient visits and the focus group discussions. Data are presented as number of persons (n) or median and range.

| <b>Patients</b>                   | Clinical visit<br>(n=46) | Focus group 1<br>(n=4) | Focus group 2<br>(n=6) |
|-----------------------------------|--------------------------|------------------------|------------------------|
| Primary care, rural               |                          | x                      |                        |
| Specialized care, urban           |                          |                        | x                      |
| Age at inclusion                  | 70 (41-85)               | 71 (58-78)             | 74 (45-76)             |
| Sex, male                         | 33, 72%                  | 4                      | 5                      |
| Education                         |                          |                        |                        |
| Mandatory                         | 20                       | 1                      | 4                      |
| High School                       | 13                       | 1                      | 1                      |
| University                        | 8                        | 2                      | 1                      |
| Months since stroke               | 3 (1-84)                 | 20 (3-84)              | 3 (1-6)                |
| Working at stroke onset (yes)     | 13                       | 2                      | 1                      |
| Length of hospitalization, (days) | 8 (2-120)                | 11 (5-82)              | 8 (4-11)               |
| History of stroke (yes)           | 9                        | 1                      | 3                      |
| Stroke characteristics            |                          |                        |                        |
| Ischemic/Haemorrhagic             | 36/5                     | 4/0                    | 4/2                    |
| Right/ left/ posterior/ bilateral | 19/16/5/2                | 3/1/0/0                | 3/2/1/0                |
| NIHSS                             | 2 (0-16)                 | 4 (3-10)               | 2 (1-6)                |
| Aphasia (yes)                     | 9                        | 0                      | 1                      |
| Neglect (yes)                     | 4                        | 1                      | 0                      |
| At discharge                      |                          |                        |                        |
| ADL independency (yes)            | 34                       | 3                      | 6                      |
| Wheel-chair use (yes)             | 4                        | 1                      | 0                      |
| <b>Health Professionals</b>       | Clinical visit<br>(n=10) | Focus group 3<br>(n=4) | Focus group 4<br>(n=4) |
| Age                               | 46 (35-63)               | 43 (37-46)             | 46 (35-55)             |
| Primary care, rural               |                          |                        | x                      |
| Specialized care, urban           |                          | x                      |                        |
| Sex, male                         | 3, 30%                   | 0                      | 1                      |
| Nurse/ OT/ Physician              | 4/1/5                    | 3/0/1                  | 0/1/3                  |
| Stroke experience (years)         |                          |                        |                        |
| ≤5/ 5-10/ 10                      | 2/2/6                    | 0/1/3                  | 2/1/1                  |

Abbreviations: NIHSS=National Institutes of Health Stroke Scale, ADL= Activities of Daily Living, OT= Occupational Therapist.

(Missing data from medical records (n=4).

## Feasibility of the PSC

Forty patients (87%) had one or more problems identified by the PSC (figure 2). ‘Life after stroke’ was most common (61%), followed by cognition (56%) and mood changes (41%). A median of four problem areas per patient (range, 0–9; interquartile range [IQR], 1–5) was identified; the median in specialised care was 3 (IQR, 1–5), and in primary care, it was 4 (IQR, 1–5). Only six (13%) patients reported no problems. Most patients (70%) acknowledged having received information about secondary prevention. Referrals were registered in eight cases, slightly more often in primary care (n=6) than in specialised care (n=2). The time taken to administer the PSC was  $\leq 15$  minutes for 52%,  $\leq 30$  minutes for 43%, and  $\geq 45$  minutes for 5%.

[Insert figure 2 near here]

Four focus groups were conducted, and their characteristics are shown in table 2. One woman dropped out because of a scheduled medical examination. The focus group discussions revealed that the PSC structure in combination with room for dialogue could support egalitarian follow-up and identification of needs. A main theme and three organisational themes emerged in these discussions (figure 3).

[Insert figure 3 near here]

## The content and relevance of the PSC

### *Item relevance*

The items included in the PSC were considered relevant to all groups. Because stroke affects persons differently, participants found it valuable that the PSC covers a broad spectrum of problems, although not all problems are relevant to every person with stroke.

### *The PSC ensures coverage of important areas, but excluded areas could be missed*

Both patients and HPs stated that some issues might be overlooked if not specifically stated in the PSC; such as nutrition, sexuality, vision, irritability and driving. The HPs discussed the appropriate amount of problem areas in the PSC. They wanted more areas yet preferred the checklist to be short and complemented by profession-specific assessments when needed. Some participants appreciated the recurring phrase “since your stroke”, but others preferred to hear/say it once at the beginning of the visit. Patients perceived the PSC as easy to

1  
2  
3 understand, while HPs expressed a concern about misunderstandings, especially for the items  
4  
5 ‘secondary prevention’ and ‘spasticity’.  
6  
7

### 8 9 The PSC as a tool for dialogue

10 Patients and HPs both emphasised the need for dialogue to create mutual understanding. HPs  
11 described that knowledge and experience affected their ability to detect problems, while  
12 patients described differences in their ability to communicate problems.  
13  
14

#### 15 16 *Dialogue facilitates patients in expressing needs and engenders feelings of being cared for*

17 Patients said that the PSC questions facilitated dialogue, leading to a greater likelihood that  
18 important areas would be elucidated and discussed. Memory problems, lack of initiative,  
19 fatigue, or being less talkative were mentioned as barriers to dialogue that the PSC could  
20 address. The PSC gave clear direction for the structure of the dialogue and accordingly  
21 facilitating identification of problems. Nevertheless, using the PSC in combination with  
22 dialogue was seen as important. Patients stated that they might need time for consideration  
23 before answering the PSC questions, time that was often not given within the limits of the  
24 visits.  
25  
26  
27  
28  
29  
30  
31

32 Generally, participants thought patients should have the opportunity to talk to a  
33 professional about stroke-related concerns and stated that the PSC could facilitate this  
34 exchange. Patients expressed that the PSC covers areas centring on them as a person, which  
35 made them feel cared for. The understanding of the HPs was that relatives often  
36 complemented information concerning problems that patients might neglect or forget to  
37 mention:  
38  
39  
40  
41  
42  
43  
44

45 *P4: “I think there is a great deal of importance to how much you are affected by the*  
46 *stroke. The more you are affected, the harder it is to think about the different facets of*  
47 *it” (the areas in the PSC). (Strongly agreed upon)*  
48

49 (Group 1. Patients)  
50  
51

#### 52 53 *The importance of HPs’ with stroke expertise and communication skills for capturing patient* 54 *needs*

55 To ensure that problems would be fully addressed, a professional’s competence in stroke was  
56 seen as key by the participants. HPs feared that lack of HP’s with stroke expertise might lead  
57  
58  
59  
60



1  
2  
3 to problems going unrecognised. The PSC was seen as an asset as well as a barrier to  
4 dialogue. If too much focus was placed on posing the questions, participants experienced a  
5 decreased interaction. Sensitivity from the HPs and use of additional questions was seen as  
6 essential (e.g. work issues, within the item 'life after stroke'):  
7  
8  
9

10  
11 *P7: "No, there's only benefits, but it depends on how you use it, and if the staff*  
12 *think it is meaningful, so it's not just checked off. Rather that you have the*  
13 *opportunity to cover the things that each point is actually about".*  
14

15  
16 *P8: "Yeah, all the stuff that's crazy [difficulties after the stroke], follow up that*  
17 *stuff."*  
18

19  
20 *Moderator: "That you have time to follow up what is included in the point? Can*  
21 *you elaborate on that?"*  
22

23  
24 *P7: "Yes, it's the topic this question is about, that you can elaborate on if you*  
25 *want to (...) the person with the checklist shouldn't be bound to it 100% and*  
26 *slavishly follow it, but understand signals from the patient and talk more*  
27 *broadly and connect it to the other things that depend upon it". (agreement)*  
28

29  
30 *P9: "Absolutely".*  
31

32  
33 *P7: "Otherwise, it just becomes mechanical; you can't be just like a computer*  
34 *asking questions".*  
35

36  
37 (Group 2. Patients)  
38

39  
40 There were conflicting opinions about how to apply the questions in the PSC. Experienced  
41 HPs preferred to use it as a supplement for memory within a free dialogue. In contrast,  
42 inexperienced HPs perceived the specific questions as good to assume and a basis for leading  
43 into other related concerns (e.g. fatigue):  
44  
45  
46  
47

48  
49 *P5: "It's more about if you think that you should use standardised things for*  
50 *everyone, even for primary healthcare/outpatient care, I don't think that really*  
51 *works".*  
52

53  
54 *P6: "Exactly, that's the question, should you use the checklist just as it is, or*  
55 *should you use it for your own part and remember. That's the thing, because*  
56 *you can then approach each patient differently and get it all. But asking the*  
57 *exact same questions for each patient, I agree, that's really hard to do".*  
58

59  
60 (Group 3. HPs)

## PSC as a systematic routine and a basis for egalitarian follow-up

### *The PSC as a shared knowledge base to be individualised for each patient*

The PSC was considered to increase knowledge about stroke and secure an egalitarian follow-up, especially for inexperienced HPs and patients with limited ability to express their needs. Even when the PSC was used, lack of HPs with stroke expertise and limited knowledge about opportunities for referrals were perceived as an obstacle to egalitarian follow-up. One suggestion was to add local referral opportunities and access to scientific references in conjunction with the PSC. Factors such as comorbidities and time since stroke must be taken into account because they could affect responses to PSC items.

### *The PSC supports continuity and referrals but depends on available resources*

Participants addressed the need for regular follow-ups and considered the PSC to be a useful tool and basis for referrals. The use of the PSC was seen as a rapid way to cover the problem areas if only the questions were used, but when supplementary questions were needed, the time need also increased. One concern, especially among the physicians, was the time taken to administer the PSC in addition to their ordinary routines. HPs emphasised that the use of the PSC should be beneficial for the patients and in accordance with time limits and referral opportunities. Some considered it a bit rigid to go through all items if the patient experienced no problems, although it was observed that it could be completed quickly.

To enable preparation beforehand and make visits more time-efficient, a patient version of the PSC was proposed. Participants strongly emphasised that problems identified by the PSC should lead to appropriate intervention and not only an evaluation of current status:

*P11: "The risk is you might get a false sense of security though. So, someone has asked the question, and I have answered "yes" to this question; so I then expect something to happen".*

(agreement from the others)

*P11: "It's like, that's what decides the quality of what happens with the measures (...). It should end with me knowing how this information is taken and handled, what happens now. Not just that you do it and then that's great. (mumbles) Is it like statistics or what?"*

(Group 1. Patients)

Lack of opportunities for interventions as well as knowledge gaps were expressed by HPs as difficulties in meeting these expectations. A specific dimension of this problem was mentioned as leading to a risk of avoidance of discussing certain items.

Table 3. Evaluation of the use of Post-Stroke Checklist (PSC) based on satisfaction ratings (Likert 1-5) by patients and health professionals.

| Satisfaction with:                        | Patients (n=46)<br>median (IQR) | Health professionals<br>(n=10) median (IQR) |
|-------------------------------------------|---------------------------------|---------------------------------------------|
| Overall assessment where PSC was used     | 5 (4-5)                         | 4 (3-4)                                     |
| Identification of needs                   | 5 (4-5)                         | -                                           |
| Identification of need (for each patient) | -                               | 3 (3-4)                                     |
| Confidence in receiving support           | 5 (4-5)                         | -                                           |
| Guidance for referrals and treatment      | -                               | 3 (2-4)                                     |

Abbreviations: IQR= interquartile range

By combining the results derived by different methods, additional aspects of the analysis can be demonstrated. The patients evaluated the satisfaction with the PSC as high (table 3). In addition, the focus group analyses gave insights into a wide range of factors that affect satisfaction, and its feasibility was exemplified by the importance of dialogue (figure 3). HP satisfaction with the PSC varied among patients (table 3). Participants perceived it as important to adapt the use of the PSC to individual aspects. Some differences regarding individual prerequisites are displayed in table 2, and others are mentioned in the qualitative analyses. HP stroke experience varied, especially in the primary care settings (table 2). In the focus group discussions, HPs with stroke expertise was perceived as important if subtle problems were to be properly recognised.

## DISCUSSION

The PSC is a relevant and feasible tool to identify patients who can benefit from targeted interventions, as noted by people with stroke and HPs. The original purpose of the PSC was to be an easy-to-use tool to detect post-stroke problems, as well as a support for guiding referrals.<sup>11</sup> This study brings out an awareness about how follow-up through the PSC could be enhanced by user perceptions and suggested strategies. This knowledge could add important insights when implementing the PSC in line with the World Stroke Organization recommendations. The focus group discussions raised issues concerning prerequisites when

1  
2  
3 using the PSC. These include HP with stroke expertise, room for dialogue, and how the  
4 identified needs were addressed.  
5

6 The wide range of post-stroke problems identified in the present study demonstrated the  
7 relevance of the PSC, with a median of four problems per patient. Of note, reported problems  
8 on specific PSC items differ considerably; 'life after stroke', cognition, and continence vary  
9 when comparing among countries.<sup>12-14</sup> Comparison should be made with caution since the  
10 groups studied differs with respect to e.g. case-mix, sampling strategies and inclusion criteria  
11 in the studies. Further, based on issues raised in the focus group discussions, likely causes of  
12 these discrepancies in reported problems could be HP stroke expertise, opportunity for a  
13 dialogue, and time limits on the administration of the PSC. Comorbidities also could affect  
14 responses to the PSC items due to respondents not being able to consider whether the  
15 problems are stroke related or not. Nevertheless, the wide range of identified problems  
16 alongside participant perceptions in this study stresses the relevance of using the PSC in  
17 clinical practice. The long-term consequences after stroke emphasise the need for a  
18 comprehensive long-term follow-up with a multi-domain approach.<sup>13 21-23</sup>  
19  
20  
21  
22  
23  
24  
25  
26  
27  
28

29 The present study provides a deeper understanding of how the PSC structure could  
30 support patients in expressing their needs. Problems with communication and comprehension  
31 are common after stroke,<sup>5</sup> which influences decision-making during follow-up. Participation  
32 in decision-making requires health literacy, i.e., the ability to understand health information  
33 and a capacity to argue for one's needs in relation to appropriate interventions.<sup>7</sup> In this study,  
34 despite perceptions that the PSC questions were easy to understand, dialogue was found to be  
35 crucial. Participants raised concerns about problem areas that could be missed depending on  
36 how the PSC was used. Results from using the PSC in the UK and Singapore<sup>12</sup> indicate that  
37 several problem areas could be indirectly identified. Awareness of the complexity of need  
38 identification underscores the role of the HP when using the PSC. Even if no unmet need is  
39 reported, a person can still identify as living with residual impairments and perceived  
40 problems in engaging in activities.<sup>24</sup> Participants expressed that identification of needs could  
41 be enhanced if more time were allowed for consideration of these needs and for additional  
42 questions; another help would be the opportunity to fill in the PSC beforehand. Current  
43 findings stress HP with stroke expertise and the need to make space for dialogue when  
44 administering the PSC to support needs identification and decision-making.  
45  
46  
47  
48  
49  
50  
51  
52  
53  
54  
55

56 The results from the present study highlight the dialogue between the patient and HP,  
57 which is central in health care.<sup>9 10 25</sup> Experienced HPs argued that they could cover most  
58 topics using open-ended questions. In contrast, others emphasised the value of articulating the  
59  
60

1  
2  
3 PSC questions literally. To enable investigation of specific areas, closed questions can be  
4 important<sup>26</sup> and facilitate situations involving patients with communication difficulties.  
5  
6 However, the PSC instructions do not hinder its use in a looser way as long as all areas are  
7  
8 captured. The result shows that patients can benefit from a clear structure when the PSC is  
9  
10 used. Participants in all focus groups agreed on the benefits of going through the areas in the  
11  
12 PSC in a way that ensures identification of unmet needs. In addition, using the PSC in  
13  
14 combination with dialogue supports the patients' capacity to communicate their needs. A  
15  
16 narrative communication, along with signs of problems, gives the HP a foundation for  
17  
18 planning care together with the patient and creates conditions for patients to make appropriate  
19  
20 health decisions.<sup>10</sup>

21  
22 The PSC can improve clinical pathways in health care by its structure and guidance for  
23  
24 further referrals. Creating a plan to take care of identified needs and locally adapted pathways  
25  
26 to support access to appropriate interventions, was noted in the focus group discussions as  
27  
28 essential.

### 29 **Strengths and limitations**

30  
31 A strength of this study is that patients were partners throughout the project, from the  
32  
33 translation process to participation in the focus group discussions. In addition, the mix of  
34  
35 methods made it possible to explore the feasibility of the PSC at different levels compared to  
36  
37 previous research. Few persons in this population had lived with their stroke for a long time,  
38  
39 and only one of them had a severe stroke, which might have affected which problems were  
40  
41 identified (e.g. spasticity). This naturalistic design in an ordinary outpatient context, however,  
42  
43 is representative of the Swedish population, where the majority have mild stroke.<sup>27</sup> The time  
44  
45 (1-2 months) between the follow-up visit where the PSC was used and the focus group  
46  
47 discussion could be a risk for recall bias. However, the focus group methodology enabled  
48  
49 exploring a range of opinions of people across groups, and together, the participants  
50  
51 contributed to rich discussions. Although the attempt was to obtain heterogeneity and  
52  
53 homogeneity in the focus groups, the majority of HPs were women and the majority of the  
54  
55 patients were male. Because the purposive sampling of HPs were made based on health care  
56  
57 facilities already chosen and the defined time limit between the visit and the focus groups, the  
58  
59 sex distribution were out of our influence. However, heterogeneity was achieved with respect  
60  
61 to different outpatient settings, patients having a range of ages, stroke characteristics, and  
62  
63 education levels, and HPs with a range of professional roles and experience in stroke. To  
64  
65 strengthen the transferability of the findings, a comprehensive description of the study

1  
2  
3 context, participant characteristics, data collection, and analysis process are included in the  
4 methods section. Nevertheless, there are limitations regarding the transferability of the  
5 findings outside of the Swedish healthcare context. To ensure the feasibility of using the PSC  
6 in another context, a cross-cultural validation is needed. However, because the World Stroke  
7 Organization recommends using the PSC globally, these results contribute to a deeper  
8 understanding of its feasibility that can also be useful to other countries.  
9  
10  
11  
12  
13  
14

### 15 **Conclusions**

16 The PSC is a feasible and relevant tool to support egalitarian follow-up and identify patients  
17 who can benefit from targeted interventions after stroke. HPs' stroke expertise, room for  
18 dialogue, and caring for identified needs were raised as important issues to consider when  
19 using the PSC. Nutrition, sexuality, driving, work and fatigue were areas mentioned that  
20 might need to be addressed within the discussions by HPs using the checklist. The PSC can  
21 facilitate patients in expressing their needs, enhancing their ability to participate in decision-  
22 making.  
23  
24  
25  
26  
27  
28  
29

### 30 **Acknowledgements**

31 The authors thank the health professionals and patients, for sharing their experiences. The  
32 authors also thank Dr Kate Bramley-Moore translation help regarding quotations from the  
33 transcribed interviews.  
34  
35  
36  
37  
38  
39

### 40 **Author contribution**

41 EK, ÅL-N, and KSS contributed to the design of the study. EK conducted the interviews and  
42 analyzed the data together with GC, involving KSS and ÅL-N in the final stages of the  
43 analysis. EK wrote the first version of the manuscript, which was reviewed by GC, ÅL-N  
44 KSS. All four authors contributed to and approved the final manuscript.  
45  
46  
47  
48

### 49 **Funding**

50 The study was funded in part by the Swedish Stroke Association; the Local Research and  
51 Development Board for Gothenburg and Södra Bohuslän; the Swedish Heart and Lung  
52 foundation; the Swedish Brain Foundation; an unconditional grant from Allergan; the Hjalmar  
53 Svenssons Foundation; Neurological Foundation; Rune and Ulla Amlövs Foundation; Per-  
54 Olof Ahls Foundation; and John and Brit Wennerströms Foundation. The study was supported  
55  
56  
57  
58  
59  
60

1  
2  
3 by grants from the Swedish state under the agreement between the Swedish government and  
4 the county councils, the ALF agreement (ALFGBG-719 80).  
5  
6

### 7 **Competing interests**

8  
9 None declared.  
10

### 11 **Data sharing**

12  
13 Due to ethical restrictions, data are available upon request. Researchers can submit requests  
14 for data to the authors (contact: ks.sunnerhagen@neuro.gu.se). Complete data from interviews  
15 cannot be made publicly available for ethical and legal reasons, according to the Swedish  
16 regulations <http://www.epn.se/en/start/regulations/>. Public availability would compromise  
17 participant privacy or confidentiality. Upon request a list of condensed meaning units or codes  
18 can be made available after removal of information that may risk the confidentiality of the  
19 participants. To access data please contact the first author: (emma.kjork@neuro.gu.se).  
20  
21  
22  
23  
24  
25  
26  
27  
28  
29  
30  
31  
32  
33  
34  
35  
36  
37  
38  
39  
40  
41  
42  
43  
44  
45  
46  
47  
48  
49  
50  
51  
52  
53  
54  
55  
56  
57  
58  
59  
60



1  
2  
3 **REFERENCES**  
4

- 5  
6 1. Crichton SL, Bray BD, McKeivitt C, et al. Patient outcomes up to 15 years after stroke:  
7 survival, disability, quality of life, cognition and mental health. *J Neurol Neurosurg*  
8 *Psychiatry* 2016;87(10):1091-8. doi: 10.1136/jnnp-2016-313361  
9
- 10 2. Ullberg T, Zia E, Petersson J, et al. Changes in functional outcome over the first year after  
11 stroke: an observational study from the Swedish stroke register. *Stroke*  
12 2015;46(2):389-94. doi: 10.1161/STROKEAHA.114.006538  
13
- 14 3. Ullberg T, Zia E, Petersson J, et al. Perceived Unmet Rehabilitation Needs 1 Year After  
15 Stroke: An Observational Study From the Swedish Stroke Register. *Stroke*  
16 2016;47(2):539-41. doi: 10.1161/STROKEAHA.115.011670  
17
- 18 4. Carlsson GE, Moller A, Blomstrand C. Consequences of mild stroke in persons <75 years -  
19 - a 1-year follow-up. *Cerebrovasc Dis* 2003;16(4):383-8. doi: 10.1159/000072561  
20
- 21 5. Cumming TB, Marshall RS, Lazar RM. Stroke, cognitive deficits, and rehabilitation: still  
22 an incomplete picture. *Int J Stroke* 2013;8(1):38-45. doi: 10.1111/j.1747-  
23 4949.2012.00972.x  
24
- 25 6. Levasseur M, Carrier A. Integrating health literacy into occupational therapy: Findings  
26 from a scoping review. *Scand J Occup Ther* 2012;19(4):305-14. doi:  
27 10.3109/11038128.2011.588724  
28
- 29 7. Mackey LM, Doody C, Werner EL, et al. Self-Management Skills in Chronic Disease  
30 Management: What Role Does Health Literacy Have? *Med Decis Making*  
31 2016;36(6):741-59. doi: 10.1177/0272989X16638330 [published Online First:  
32 2016/04/08]  
33
- 34 8. Kirkevold M. The unfolding illness trajectory of stroke. *Disabil Rehabil* 2002;24(17):887-  
35 98. doi: 10.1080/09638280210142239  
36
- 37 9. Tistad M, Ytterberg C, Tham K, et al. Poor concurrence between disabilities as described  
38 by patients and established assessment tools three months after stroke: a mixed  
39 methods approach. *J Neurol Sci* 2012;313(1-2):160-6. doi: 10.1016/j.jns.2011.08.038  
40 [published Online First: 2011/09/23]  
41
- 42 10. Ekman I, Swedberg K, Taft C, et al. Person-centered care—Ready for prime time. *Eur J*  
43 *Cardiovasc Nurs* 2011;10(4):248-51.  
44
- 45 11. Philp I, Brainin M, Walker MF, et al. Development of a poststroke checklist to  
46 standardize follow-up care for stroke survivors. *J Stroke Cerebrovasc Dis*  
47 2013;22(7):e173-80. doi: 10.1016/j.jstrokecerebrovasdis.2012.10.016  
48  
49  
50  
51  
52  
53  
54  
55  
56  
57  
58  
59  
60



12. Ward AB, Chen C, Norrving B, et al. Evaluation of the Post Stroke Checklist: a pilot study in the United Kingdom and Singapore. *Int J Stroke* 2014;9 Suppl A100(A100):76-84. doi: 10.1111/ijvs.12291
13. Iosa M, Lupo A, Morone G, et al. Post Soft Care: Italian implementation of a post-stroke checklist software for primary care and identification of unmet needs in community-dwelling patients. *Neurol Sci* 2017;39(1):135-39. doi: 10.1007/s10072-017-3140-1
14. Hotter B, Padberg I, Liebenau A, et al. Identifying unmet needs in long-term stroke care using in-depth assessment and the Post-Stroke Checklist – The Managing Aftercare for Stroke (MAS-I) study. *European Stroke Journal* 2018;3(3):237-45. doi: 10.1177/2396987318771174
15. Krueger RA. Focus groups: A practical guide for applied research. 5th ed. London: Sage publications 2014.
16. Ivanoff SD, Hultberg J. Understanding the multiple realities of everyday life: basic assumptions in focus-group methodology. *Scand J Occup Ther* 2006;13(2):125-32.
17. Craig P, Dieppe P, Macintyre S, et al. Developing and evaluating complex interventions: the new Medical Research Council guidance. *BMJ* 2008;337:a1655. doi: 10.1136/bmj.a1655
18. Beaton DE, Bombardier C, Guillemin F, et al. Guidelines for the process of cross-cultural adaptation of self-report measures. *Spine (Phila Pa 1976)* 2000;25(24):3186-91. [published Online First: 2000/12/22]
19. Tong A, Sainsbury P, Craig J. Consolidated criteria for reporting qualitative research (COREQ): a 32-item checklist for interviews and focus groups. *Int J Qual Health Care* 2007;19(6)
20. Malterud K, Siersma VD, Guassora AD. Sample Size in Qualitative Interview Studies: Guided by Information Power. *Qual Health Res* 2015 doi: 10.1177/1049732315617444 [published Online First: 2015/11/29]
21. Paul SL, Srikanth VK, Thrift AG. The large and growing burden of stroke. *Curr Drug Targets* 2007;8(7):786-93. [published Online First: 2007/07/17]
22. Stevens E, Emmett E, Wang DY, et al. The Burden Of Stroke In Europe Report London: SAFE Stroke Alliance For Europe 2017.
23. Norrving B, Barrick J, Davalos A, et al. Action Plan for Stroke in Europe 2018–2030. *European Stroke Journal*;0(0):2396987318808719. doi: 10.1177/2396987318808719

- 1  
2  
3 24. Shannon RL, Forster A, Hawkins RJ. A qualitative exploration of self-reported unmet  
4 need one year after stroke. *Disabil Rehabil* 2016;38(20):2000-7. doi:  
5 10.3109/09638288.2015.1107784  
6  
7  
8 25. Williams MV, Davis T, Parker RM, et al. The role of health literacy in patient-physician  
9 communication. *Fam Med* 2002;34(5):383-9.  
10  
11 26. Silverman J, Kurtz S, Draper J. Skills for communicating with patients. 3rd ed. London:  
12 CRC Press 2016.  
13  
14 27. Reinholdsson M, Palstam A, Sunnerhagen KS. Prestroke physical activity could influence  
15 acute stroke severity (part of PAPSIGOT). *Neurology* 2018;91(16):e1461-e67. doi:  
16 10.1212/WNL.0000000000006354 [published Online First: 2018/09/21]  
17  
18  
19  
20  
21  
22  
23  
24  
25  
26  
27  
28  
29  
30  
31  
32  
33  
34  
35  
36  
37  
38  
39  
40  
41  
42  
43  
44  
45  
46  
47  
48  
49  
50  
51  
52  
53  
54  
55  
56  
57  
58  
59  
60

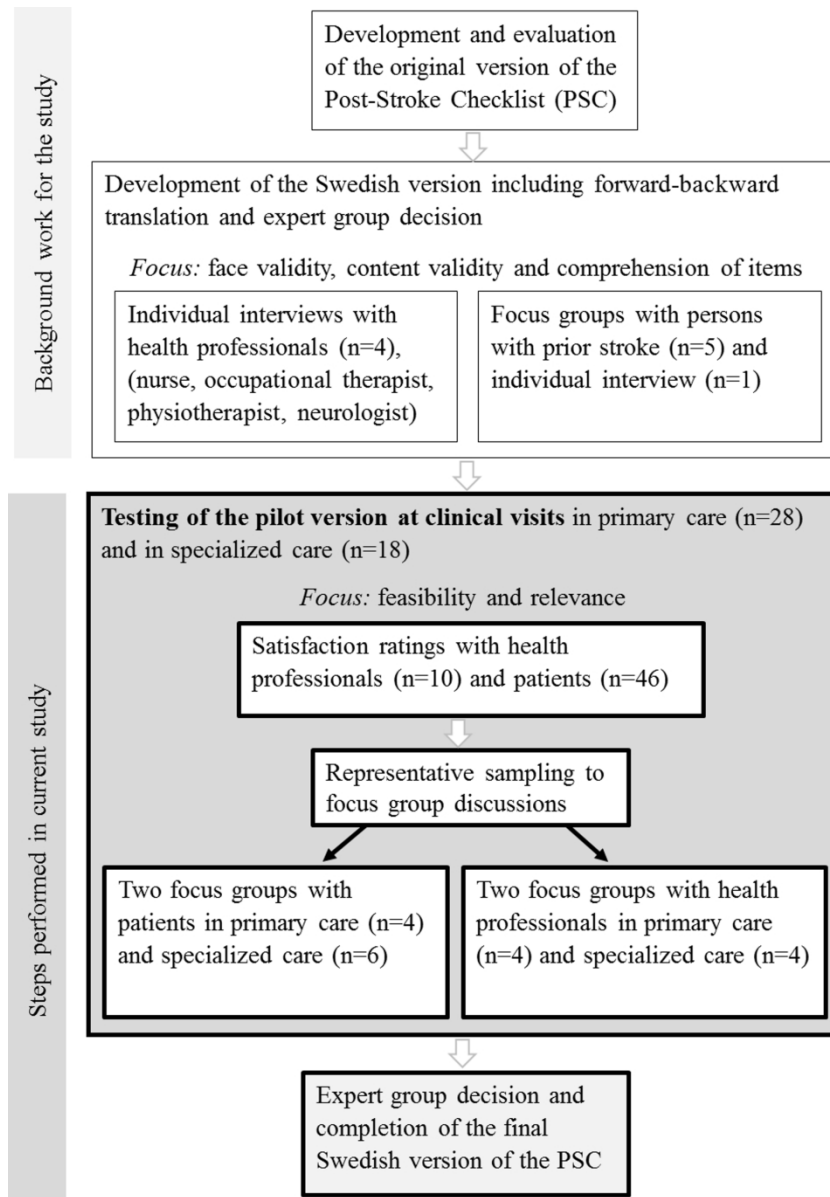

45 Figure 1. The steps included in the validation and cross-cultural adaptation of the Swedish version of the  
46 PSC including background work and current study.

47 199x267mm (300 x 300 DPI)

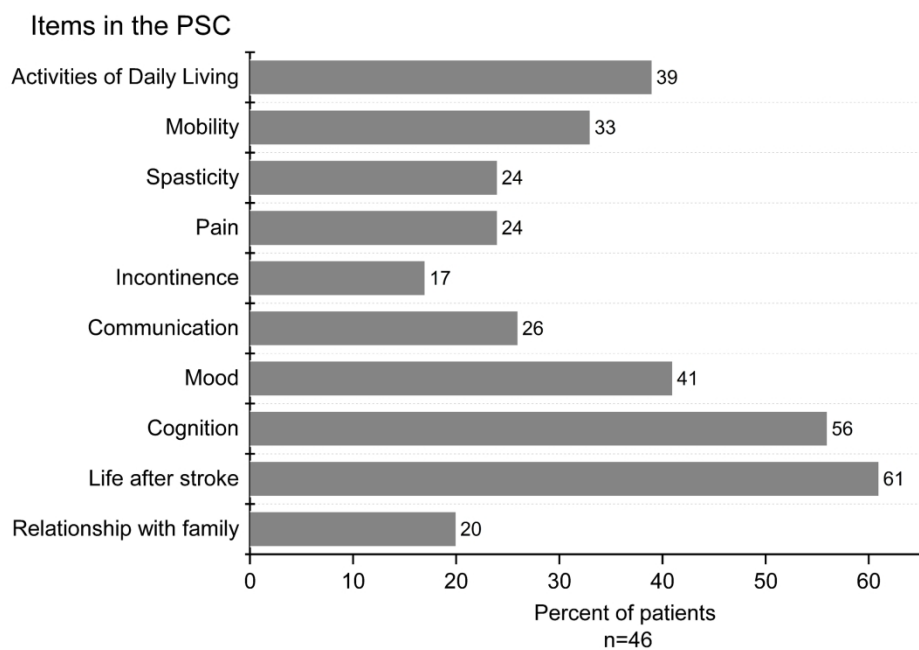

Figure 2. Percentages of patients with identified problems in each Post-Stroke Checklist item (n=46).

229x160mm (300 x 300 DPI)

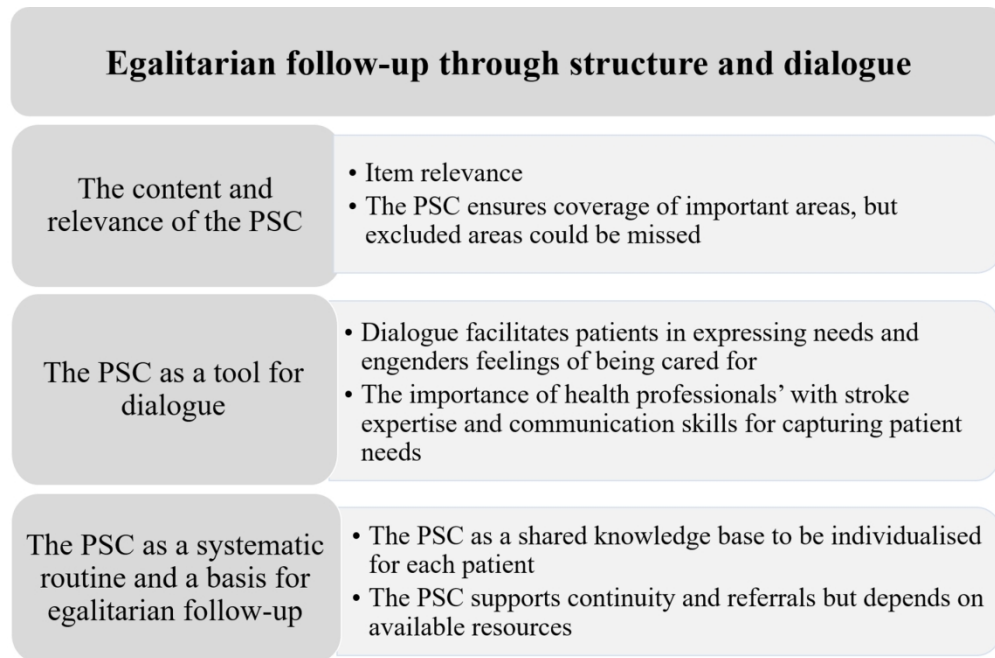

28 Figure 3. Themes and subthemes derived from the focusgroup discussions with patients and health  
29 professionals regarding experiences of using the Post-Stroke Checklist.

30 169x111mm (300 x 300 DPI)

## Appendix 2 - COREQ 32-item checklist

| No. Item                                       | Guide questions/description                                  | Comments                                                                                                         |
|------------------------------------------------|--------------------------------------------------------------|------------------------------------------------------------------------------------------------------------------|
| <b>Domain 1: Research team and reflexivity</b> |                                                              |                                                                                                                  |
| <i>Personal characteristics</i>                |                                                              |                                                                                                                  |
| 1. Interviewer/facilitator                     | Which author/s conducted the interview?                      | EK (p.6)                                                                                                         |
| 2. Credentials                                 | What were the researcher's credentials? <i>e.g., PhD, MD</i> | 3 Occupational Therapists (1 associate professor, 1 PhD, and 1 MS, PhD student)<br>1 Medical doctor, (Professor) |
| 3. Occupation                                  | What was their occupation at the time of the study?          | Researchers                                                                                                      |
| 4. Gender                                      | Was the researcher male or female?                           | 4 female (p. 6-7)                                                                                                |
| 5. Experience and training                     | What experience or training did the researchers have?        | > 20 years in stroke rehab, Qualitative research (p. 7)                                                          |
| <i>Relationship with participants</i>          |                                                              |                                                                                                                  |

|                                             |                                                                                                                                                                 |                                                                                                      |
|---------------------------------------------|-----------------------------------------------------------------------------------------------------------------------------------------------------------------|------------------------------------------------------------------------------------------------------|
| 6. Relationship established                 | Was a relationship established prior to study commencement?                                                                                                     | The moderator had met some of the health professionals in work related situations.                   |
| 7. Participant knowledge of the interviewer | What did the participants know about the researcher? <i>e.g., personal goals, reasons for doing the research</i>                                                | Broad outlines given                                                                                 |
| 8. Interviewer characteristics              | What characteristics were reported about the interviewer/facilitator?<br><i>E.g., bias, assumptions, reasons and interests in the research topic</i>            | (p. 5)                                                                                               |
| <b>Domain 2: study design</b>               |                                                                                                                                                                 |                                                                                                      |
| <i>Theoretical framework</i>                |                                                                                                                                                                 |                                                                                                      |
| 9. Methodological orientation and Theory    | What methodological orientation was stated to underpin the study? <i>e.g. grounded theory, discourse analysis, ethnography, phenomenology, content analysis</i> | Focus group according to Kreuger, underpinned by a methodology based on Social constructivism (p. 4) |
| <i>Participant selection</i>                |                                                                                                                                                                 |                                                                                                      |

|                                  |                                                                                           |                                                                                 |
|----------------------------------|-------------------------------------------------------------------------------------------|---------------------------------------------------------------------------------|
| 10. Sampling                     | How were participants selected? <i>e.g. purposive, convenience, consecutive, snowball</i> | Purposive (p. 5)                                                                |
| 11. Method of approach           | How were participants approached? <i>e.g. face-to-face, telephone, mail, email</i>        | Face to face and by telephone (p. 5)                                            |
| 12. Sample size                  | How many participants were in the study?                                                  | In total, 18 (patients/HPs) participated in the focus groups (see table 2, p 7) |
| 13. Non-participation            | How many people refused to participate or dropped out? Reasons?                           | One dropped out because of a scheduled medical examination (p. 9)               |
| <i>Setting</i>                   |                                                                                           |                                                                                 |
| 14. Setting of data collection   | Where was the data collected? <i>e.g. home, clinic, workplace</i>                         | Clinical setting (p. 5)                                                         |
| 15. Presence of non-participants | Was anyone else present besides the participants and researchers?                         | No (p. 6)                                                                       |
| 16. Description of sample        | What are the important characteristics of the sample? <i>e.g. demographic data, date</i>  | People with stroke in a late phase of stroke recovery (p. 7, table 2)           |
| <i>Data collection</i>           |                                                                                           |                                                                                 |



|                                        |                                                                               |                                                                                |
|----------------------------------------|-------------------------------------------------------------------------------|--------------------------------------------------------------------------------|
| 17. Interview guide                    | Were questions, prompts, guides provided by the authors? Was it pilot tested? | A interview guide was provided (p.6).<br>A pilot testing was conducted (p. 5). |
| 18. Repeat interviews                  | Were repeat interviews carried out?                                           | No, each group met once (p. 6)                                                 |
| 19. Audio/visual recording             | Did the researchers use audio or visual recording to collect the data?        | Audio (p. 6 )                                                                  |
| 20. Field notes                        | Were field notes made during and/or after the interview or focus group?       | Yes                                                                            |
| 21. Duration                           | What was the duration of the interviews or focus group?                       | Approximately 1.5 hours (p. 6 )                                                |
| 22 Data saturation                     | Was data saturation discussed?                                                | Yes (p. 6)                                                                     |
| 23. Transcripts returned               | Were transcripts returned to participants for comment and/or correction?      | No                                                                             |
| <b>Domain 3: analysis and findings</b> |                                                                               |                                                                                |
| <i>Data analysis</i>                   |                                                                               |                                                                                |
| 24. Number of data coders              | How many data coders coded the data?                                          | Two (EK and GC) (p. 6 )                                                        |
| 25. Description of the coding tree     | Did authors provide a description of the coding tree?                         | Yes.                                                                           |
| 26. Derivation of themes               | Were themes identified in advance or derived from the data?                   | Derived from the data (p. 6)                                                   |

|                                  |                                                                                                                                        |                                                         |
|----------------------------------|----------------------------------------------------------------------------------------------------------------------------------------|---------------------------------------------------------|
| 27. Software                     | What software, if applicable, was used to manage the data?                                                                             | Nvivo (p. 6)                                            |
| 28. Participant checking         | Did participants provide feedback on the findings?                                                                                     | No, not specifically, but a general presentation (p. 5) |
| <i>Reporting</i>                 |                                                                                                                                        |                                                         |
| 29. Quotations presented         | Were participant quotations presented to illustrate the themes/findings? Was each quotation identified? <i>e.g. participant number</i> | Yes (Results)                                           |
| 30. Data and findings consistent | Was there consistency between the data presented and the findings?                                                                     | Yes (Results and Discussion)                            |
| 31. Clarity of major themes      | Were major themes clearly presented in the findings?                                                                                   | Yes (Figure 3 and results)                              |
| 32. Clarity of minor themes      | Is there a description of diverse cases or discussion of minor themes?                                                                 | Yes (Results and Discussion)                            |

# BMJ Open

## Experiences using the Post-Stroke Checklist in Sweden with a focus on feasibility and relevance: a mixed-method design

|                                 |                                                                                                                                                                                                                                                                                                                                                                                                                                                                                                                        |
|---------------------------------|------------------------------------------------------------------------------------------------------------------------------------------------------------------------------------------------------------------------------------------------------------------------------------------------------------------------------------------------------------------------------------------------------------------------------------------------------------------------------------------------------------------------|
| Journal:                        | <i>BMJ Open</i>                                                                                                                                                                                                                                                                                                                                                                                                                                                                                                        |
| Manuscript ID                   | bmjopen-2018-028218.R2                                                                                                                                                                                                                                                                                                                                                                                                                                                                                                 |
| Article Type:                   | Research                                                                                                                                                                                                                                                                                                                                                                                                                                                                                                               |
| Date Submitted by the Author:   | 21-Feb-2019                                                                                                                                                                                                                                                                                                                                                                                                                                                                                                            |
| Complete List of Authors:       | Kjörk, Emma K; University of Gothenburg, Institute of Neuroscience and Physiology, Department of Clinical Neuroscience<br>Carlsson, Gunnel; University of Gothenburg, Institute of Neuroscience and Physiology, Department of Clinical Neuroscience<br>Sunnerhagen, Katharina; University of Gothenburg, Institute of Neuroscience and Physiology, Department of Clinical Neuroscience<br>Lundgren-Nilsson, Asa; Gothenburg University, Institute of Neuroscience and Physiology, Department och Clinical Neuroscience |
| <b>Primary Subject Heading</b>: | Cardiovascular medicine                                                                                                                                                                                                                                                                                                                                                                                                                                                                                                |
| Secondary Subject Heading:      | Evidence based practice, Health services research, Rehabilitation medicine                                                                                                                                                                                                                                                                                                                                                                                                                                             |
| Keywords:                       | long-term care, Feasibility, Focus groups, Follow-up, Standard of Care, Stroke < NEUROLOGY                                                                                                                                                                                                                                                                                                                                                                                                                             |
|                                 |                                                                                                                                                                                                                                                                                                                                                                                                                                                                                                                        |

SCHOLARONE™  
Manuscripts

# Experiences using the Post-Stroke Checklist in Sweden with a focus on feasibility and relevance: a mixed-method design

Emma K Kjörk\* OT, MS<sup>1,2</sup>, Gunnel Carlsson OT, PhD<sup>1</sup>, Katharina S Sunnerhagen MD, PhD, Prof<sup>1</sup> and Åsa Lundgren-Nilsson OT, PhD<sup>1</sup>

<sup>1</sup>Institute of Neuroscience and Physiology, Dep of Clinical Neuroscience, Sahlgrenska Academy at University of Gothenburg, Gothenburg, Sweden

<sup>2</sup>Department of Occupational Therapy and Physiotherapy, Sahlgrenska University Hospital, Gothenburg, Sweden

## \* Corresponding author:

Emma K Kjörk

Email address: [emma.kjork@neuro.gu.se](mailto:emma.kjork@neuro.gu.se)

Telephone: +46313422803

Postal address:

Institute of Neuroscience and Physiology  
Dep of Clinical Neuroscience, Rehabilitation medicine  
Per Dubbsgatan 14, fl. 3, 413 45 Gothenburg, Sweden

Word count Abstract: 300 words

Word count Main manuscript: 3993 words

Number of tables: 3

Number of figures: 3

# Experiences using the Post-Stroke Checklist in Sweden with a focus on feasibility and relevance: a mixed-method design

## ABSTRACT

**Objective** The wide range of outcomes after stroke emphasises the need for comprehensive long-term follow-up. The aim was to evaluate how people with stroke and health professionals (HPs') perceive the use of the Post-Stroke Checklist (PSC), with a focus on feasibility and relevance.

**Design** An exploratory design with a mix of qualitative and quantitative methods.

**Setting** Outpatient care at a university hospital and primary care centres in western Sweden.

**Participants** Forty-six consecutive patients (median age, 70; range, 41–85; 13 women) and ten health professionals (median age 46; range, 35–63; 7 women).

**Results** Most patients (87%) had one or more problems identified by the PSC. The most common problem areas were life after stroke (61%), cognition (56%), mood (41%), and activities of daily living (39%). Three organisational themes emerged from the focus group discussions. The perception of *the content and relevance of the PSC* was that common post-stroke problems were covered but that unmet needs still could be missed. Identifying needs was facilitated when using the *PSC as a tool for dialogue*. The dialogue between the patient and HP as well as HPs stroke expertise was perceived as important. The PSC was seen as *a systematic routine and a base for egalitarian follow-up*, but participants stressed consideration given to each individual. Addressing identified needs and meeting patient expectations were described as challenging given available healthcare services.

**Conclusions** The PSC is a feasible and relevant tool to support egalitarian follow-up and identify patients who could benefit from targeted post-stroke interventions. Stroke expertise, room for dialogue, and caring for identified needs emerged as important issues to consider when using the PSC. Nutrition, sexuality and fatigue were areas mentioned that might need to be addressed within the discussions. The PSC can facilitate patients in expressing their needs, enhancing their ability to participate in decision-making.

1  
2  
3 **Keywords** Stroke, Rehabilitation, Standard of care, Feasibility, Focus groups, Follow-up  
4  
5

6  
7 **Strengths and limitations (bullet points)**  
8

- 9
- 10 • A strength of this study is having patients as partners throughout the project, from the  
11 translation process to participation in the focus groups.  
12
  - 13
  - 14 • The mix of methods made it possible to explore the feasibility of the PSC from  
15 different perspectives and at different levels compared to previous research.  
16
  - 17
  - 18
  - 19 • A limitation is the lack of data collected from people with severe stroke, although this  
20 lack is typical of this naturalistic design and representative for the Swedish stroke  
21 population.  
22
  - 23
  - 24
  - 25
  - 26 • A study strength is the heterogeneous population from different outpatient settings,  
27 including a range of ages, stroke characteristics, and education levels, and health  
28 professionals with a range of experience in stroke care.  
29
  - 30
  - 31
  - 32
  - 33 • The study was conducted in a Swedish context, and the transferability of the findings  
34 in other cultural contexts is not known.  
35  
36  
37  
38  
39  
40  
41  
42  
43  
44  
45  
46  
47  
48  
49  
50  
51  
52  
53  
54  
55  
56  
57  
58  
59  
60

## INTRODUCTION

Post-stroke impairments often have long-term negative consequences for social relationships, dependence in daily life, and quality of life.<sup>1</sup> Perceived unfulfilled rehabilitation needs and changes in functioning during the first year after stroke<sup>2,3</sup> indicate the need for systematic long-term follow-up. Furthermore, a subtle decline in cognition as well as emotional problems<sup>4,5</sup> can easily be overlooked, leading to difficulty in accessing healthcare services.<sup>6,7</sup>

The adaptation process after stroke is long. In later phases, the focus changes from the stroke itself to more familiar aspects of daily life,<sup>8</sup> which may not be sufficiently targeted in current practice. Concordance is poor between perceived problems and problems detected by standardised assessments. Accordingly, dialogue should complement assessments to ensure that health services are based on patient needs,<sup>9</sup> in line with a person-centred approach.<sup>10</sup>

The Post-Stroke Checklist (PSC)<sup>11</sup> was developed to identify long-term care needs and facilitate referrals.<sup>11,12</sup> Although the PSC has been found to be feasible and useful,<sup>12-14</sup> knowledge is lacking about the perspectives of patients and health professionals (HPs) regarding its use in the Swedish health care context. The aim of this study was to evaluate how people with stroke and HPs perceive the use of the PSC, with a focus on feasibility and relevance.

## METHODS

### Study design

The study has an exploratory design. To capture the feasibility of using the PSC, we combined it with a satisfaction questionnaire and focus group discussions,<sup>15,16</sup> in line with guidelines for complex interventions.<sup>17</sup> This study is part of a validation and cultural adaptation process<sup>18</sup> of the PSC in Sweden (figure 1). By combining data collection methods, we expected to gain a deeper understanding of using the PSC as a tool to structure follow-up. The underpinning methodology in the focus groups is based on social constructivism.<sup>16</sup> Consolidated criteria for reporting qualitative research (i.e., COREQ guidelines)<sup>19</sup> were followed for reporting qualitative data.

[Insert figure 1 near here]

## Patient and public involvement

This study explores how people with stroke experience the PSC. People from the Swedish Stroke Association (patient association) were involved in the translation process, the pilot testing of the interview guide, and focus group discussions and have been given a presentation of preliminary results.

## Participants

Participants were consecutively recruited while at a clinical visit in primary care or stroke specialised outpatient care at a university hospital, February 2015 to October 2015. The inclusion criterion was having had a stroke, regardless of the time of onset. The number of patients included was in accordance with a previous study<sup>12</sup> and principles for cross-cultural adaptation suggesting approximately 40.<sup>18</sup> Patients were excluded if cognitive impairment or insufficient knowledge of Swedish would have made the response to the PSC items unreliable. HPs from different clinics were invited to participate and selected to represent different professions. A purposive sampling was used with the attempt to achieve heterogeneity and homogeneity in the focus groups.<sup>15 16</sup> Written informed consent was obtained from all participants, and the regional ethical review board in Gothenburg approved the study (no. 521-14).

## Data collection

The PSC<sup>11</sup> has 11 items and is intended to identify post-stroke problems. It was developed by a multi-professional group of stroke experts, according to a Delphi process. Problem areas were chosen for having the greatest impact on patient quality of life that could be addressed with evidence-based interventions. The PSC includes secondary prevention, activities of daily living (ADLs), mobility, spasticity, pain, incontinence, communication, mood, cognition, life after stroke, and relationship with family. A response scale includes 'yes' and 'no' and recommended referrals adjacent to each problem area.<sup>11</sup>

Data collection was conducted in outpatient clinical facilities in two steps. For step 1, the HP administered the PSC to patients at a regular clinical visit (proxy responses were allowed). No additional training was given beyond the general instructions on the PSC. Participants were asked to reflect on the usefulness of the PSC as the basis for focus group discussions. Patients and HPs assessed satisfaction with the PSC after each visit through a satisfaction questionnaire with questions analogous to those used in a previous study.<sup>12</sup> The answers were rated on a Likert scale of 1–5, where 1 indicated not satisfied and 5 completely



1  
2  
3 satisfied. To ensure anonymity, patient responses were collected in an envelope. Demographic  
4 data (time since index stroke, age, sex), time to administration of the PSC, and HP profession  
5 were registered. In addition, if any referrals were made it was registered as yes/no for each  
6 patient without specification of what kind of referrals or standardised "actions" to be taken. Of  
7 the patients who gave informed consent, additional patient characteristics (such as type of  
8 stroke, aphasia, ADL dependency) were collected retrospectively from their medical records.  
9

10  
11 For step 2, the staff invited all participants during the follow-up to join in a focus group  
12 discussion. A set time of approximately 1-2 months was given between the visit and the focus  
13 group discussions. The first author (EK) telephoned participants willing to participate and sent  
14 them the study information letter, time for appointment, and a copy of the PSC. In total, four  
15 focus groups were conducted using a question guide.<sup>15</sup> Each focus group met once for  
16 approximately 1.5 hours. The meeting was recorded and transcribed verbatim. Initially in the  
17 focus groups, the importance of bringing up different opinions was emphasised. At the end, an  
18 oral overview was presented to ensure that participant contributions were as they intended.  
19  
20  
21  
22  
23  
24  
25  
26  
27  
28

### 29 **Data analysis**

30 Data gathered from PSC items, questionnaires, and demographic information were analysed  
31 using descriptive statistics with Statistical Package for the Social Sciences version 24. Data  
32 gathered from focus groups were analysed following Kreuger.<sup>15</sup> The aim of the analysis  
33 process was to describe the participants' perceptions and experiences based on the aim of the  
34 study.  
35  
36  
37  
38

39 Immediately after each focus group discussion, a written summary was created. The  
40 transcripts were coded using the computer software NVivo. First, the transcripts were read in  
41 their entirety to allow familiarity with the content as a whole, and discussions relevant to the  
42 aim were identified. Second, transcripts were systematised into categories based on  
43 similarities and differences in the discussions. Third, a descriptive summary was made for  
44 each category, adhering as closely as possible to the content of the raw data. Finally, these  
45 summaries in combination with selected quotes served as the basis for the interpretation and  
46 presented a deeper insight into the findings. In the analysis process, identified patterns were  
47 compared and contrasted across all four groups, resulting in an overarching thematic structure  
48 (for examples of the coding tree and themes see table 1). Quotations that showed the ongoing  
49 discussions<sup>16</sup> were selected to illuminate the results. Based on sampling strategies<sup>20</sup> and when  
50 similar discussions recurred in all groups<sup>15</sup>, data gathering stopped.  
51  
52  
53  
54  
55  
56  
57  
58  
59  
60

The first author (PhD student, OT, woman) was the moderator and performed most of the analysis. Multiple coding, continuous interpretation of data and discussion of the emerging themes were completed together with the second author (PhD, OT, woman) to ensure accuracy of the analysis. The first author had knowledge about the study topic and the second author in qualitative methods. Both have conducted interviews previously. The third author (PhD, MD, woman) and last author (PhD, OT, woman) contributed with knowledge concerning revising and refining the themes. All authors have at least 20 years of experience in stroke rehabilitation.

Table 1. Examples illustrating the coding tree.

| Quote                                                                                                                                                                                                                                                                                                                                                                         | Code                                                                        | Subtheme                                                                                          |
|-------------------------------------------------------------------------------------------------------------------------------------------------------------------------------------------------------------------------------------------------------------------------------------------------------------------------------------------------------------------------------|-----------------------------------------------------------------------------|---------------------------------------------------------------------------------------------------|
| P4: "It has a lot to do with the competence of the person who's asking the questions so they can do the thinking to squeeze it all in"<br>(Group 1 Patients)                                                                                                                                                                                                                  | The professionals' expertise and reasoning                                  | The importance of HPs' with stroke expertise and communication skills for capturing patient needs |
| P2: "So, I think it has just been positive, and it is also done so quickly".<br>P1: "That's also a positive".<br>P2: "Yeah, it's fast, but you can also develop it as much as you want. But asking the questions doesn't take too long".<br>Moderator: "Is it quick?"<br>P1: "Yes. It also depends on what answers you get".<br>P2: "Yes".<br>(Group 4. Health professionals) | The administration of the PSC can be adapted, quickly done or more in-depth | The PSC supports continuity and referrals but depends on available resources                      |

## RESULTS

### Study group

The PSC was used in connection with a clinical visit in 46 patients. All patients lived in their homes. Most of them (65%) had experienced a stroke within 3 months at enrolment. The median time for hospitalisation was 8 days. Stroke severity at stroke onset was mild, with a

median of 2 according to National Institutes of Health Stroke Scale. Table 2 shows the characteristics of the participants and the focus groups.

Table 2. Characteristics of patients and health professionals in the clinical outpatient visits and the focus group discussions. Data are presented as number of persons (n) or median and range.

| <b>Patients</b>                   | Clinical visit<br>(n=46) | Focus group 1<br>(n=4) | Focus group 2<br>(n=6) |
|-----------------------------------|--------------------------|------------------------|------------------------|
| Primary care, rural               |                          | x                      |                        |
| Specialized care, urban           |                          |                        | x                      |
| Age at inclusion                  | 70 (41-85)               | 71 (58-78)             | 74 (45-76)             |
| Sex, male                         | 33, 72%                  | 4                      | 5                      |
| Education                         |                          |                        |                        |
| Mandatory                         | 20                       | 1                      | 4                      |
| High School                       | 13                       | 1                      | 1                      |
| University                        | 8                        | 2                      | 1                      |
| Months since stroke               | 3 (1-84)                 | 20 (3-84)              | 3 (1-6)                |
| Working at stroke onset (yes)     | 13                       | 2                      | 1                      |
| Length of hospitalization, (days) | 8 (2-120)                | 11 (5-82)              | 8 (4-11)               |
| History of stroke (yes)           | 9                        | 1                      | 3                      |
| Stroke characteristics            |                          |                        |                        |
| Ischemic/Haemorrhagic             | 36/5                     | 4/0                    | 4/2                    |
| Right/ left/ posterior/ bilateral | 19/16/5/2                | 3/1/0/0                | 3/2/1/0                |
| NIHSS                             | 2 (0-16)                 | 4 (3-10)               | 2 (1-6)                |
| Aphasia (yes)                     | 9                        | 0                      | 1                      |
| Neglect (yes)                     | 4                        | 1                      | 0                      |
| At discharge                      |                          |                        |                        |
| ADL independency (yes)            | 34                       | 3                      | 6                      |
| Wheel-chair use (yes)             | 4                        | 1                      | 0                      |
| <b>Health Professionals</b>       | Clinical visit<br>(n=10) | Focus group 3<br>(n=4) | Focus group 4<br>(n=4) |
| Age                               | 46 (35-63)               | 43 (37-46)             | 46 (35-55)             |
| Primary care, rural               |                          |                        | x                      |
| Specialized care, urban           |                          | x                      |                        |
| Sex, male                         | 3, 30%                   | 0                      | 1                      |
| Nurse/ OT/ Physician              | 4/1/5                    | 3/0/1                  | 0/1/3                  |
| Stroke experience (years)         |                          |                        |                        |
| ≤5/ 5-10/ 10                      | 2/2/6                    | 0/1/3                  | 2/1/1                  |

Abbreviations: NIHSS=National Institutes of Health Stroke Scale, ADL= Activities of Daily Living, OT= Occupational Therapist.

(Missing data from medical records (n=4).

## Feasibility of the PSC

Forty patients (87%) had one or more problems identified by the PSC (figure 2). ‘Life after stroke’ was most common (61%), followed by cognition (56%) and mood changes (41%). A median of four problem areas per patient (range, 0–9; interquartile range [IQR], 1–5) was identified; the median in specialised care was 3 (IQR, 1–5), and in primary care, it was 4 (IQR, 1–5). Only six (13%) patients reported no problems. Most patients (70%) acknowledged having received information about secondary prevention. Referrals were registered in eight cases, slightly more often in primary care (n=6) than in specialised care (n=2). The time taken to administer the PSC was  $\leq 15$  minutes for 52%,  $\leq 30$  minutes for 43%, and  $\geq 45$  minutes for 5%.

[Insert figure 2 near here]

Four focus groups were conducted, and their characteristics are shown in table 2. One woman dropped out because of a scheduled medical examination. The focus group discussions revealed that the PSC structure in combination with room for dialogue could support egalitarian follow-up and identification of needs. A main theme and three organisational themes emerged in these discussions (figure 3).

[Insert figure 3 near here]

## The content and relevance of the PSC

### *Item relevance*

The items included in the PSC were considered relevant to all groups. Because stroke affects persons differently, participants found it valuable that the PSC covers a broad spectrum of problems, although not all problems are relevant to every person with stroke.

### *The PSC ensures coverage of important areas, but excluded areas could be missed*

Both patients and HPs stated that some issues might be overlooked if not specifically stated in the PSC; such as nutrition, sexuality, vision, irritability and driving. The HPs discussed the appropriate amount of problem areas in the PSC. They wanted more areas yet preferred the checklist to be short and complemented by profession-specific assessments when needed.

Some participants appreciated the recurring phrase “since your stroke”, but others preferred to hear/say it once at the beginning of the visit. Patients perceived the PSC as easy to

1  
2  
3 understand, while HPs expressed a concern about misunderstandings, especially for the items  
4  
5 ‘secondary prevention’ and ‘spasticity’.  
6  
7

### 8 9 *The PSC as a tool for dialogue*

10 Patients and HPs both emphasised the need for dialogue to create mutual understanding. HPs  
11 described that knowledge and experience affected their ability to detect problems, while  
12 patients described differences in their ability to communicate problems.  
13  
14

#### 15 16 17 *Dialogue facilitates patients in expressing needs and engenders feelings of being cared for*

18 Patients said that the PSC questions facilitated dialogue, leading to a greater likelihood that  
19 important areas would be elucidated and discussed. Memory problems, lack of initiative,  
20 fatigue, or being less talkative were mentioned as barriers to dialogue that the PSC could  
21 address. The PSC gave clear direction for the structure of the dialogue and accordingly  
22 facilitating identification of problems. Nevertheless, using the PSC in combination with  
23 dialogue was seen as important. Patients stated that they might need time for consideration  
24 before answering the PSC questions, time that was often not given within the limits of the  
25 visits.  
26  
27  
28  
29  
30  
31

32 Generally, participants thought patients should have the opportunity to talk to a  
33 professional about stroke-related concerns and stated that the PSC could facilitate this  
34 exchange. Patients expressed that the PSC covers areas centring on them as a person, which  
35 made them feel cared for. The understanding of the HPs was that relatives often  
36 complemented information concerning problems that patients might neglect or forget to  
37 mention:  
38  
39  
40  
41  
42  
43  
44

45 *P4: “I think there is a great deal of importance to how much you are affected by the*  
46 *stroke. The more you are affected, the harder it is to think about the different facets of*  
47 *it” (the areas in the PSC). (Strongly agreed upon)*  
48

49 (Group 1. Patients)  
50  
51

#### 52 53 54 *The importance of HPs’ with stroke expertise and communication skills for capturing patient* 55 *needs*

56 To ensure that problems would be fully addressed, a professional’s competence in stroke was  
57 seen as key by the participants. HPs feared that lack of HP’s with stroke expertise might lead  
58  
59  
60

1  
2  
3 to problems going unrecognised. The PSC was seen as an asset as well as a barrier to  
4 dialogue. If too much focus was placed on posing the questions, participants experienced a  
5 decreased interaction. Sensitivity from the HPs and use of additional questions was seen as  
6 essential (e.g. work issues, within the item 'life after stroke'):  
7  
8  
9

10  
11 *P7: "No, there's only benefits, but it depends on how you use it, and if the staff*  
12 *think it is meaningful, so it's not just checked off. Rather that you have the*  
13 *opportunity to cover the things that each point is actually about".*  
14

15  
16 *P8: "Yeah, all the stuff that's crazy [difficulties after the stroke], follow up that*  
17 *stuff."*  
18

19  
20 *Moderator: "That you have time to follow up what is included in the point? Can*  
21 *you elaborate on that?"*  
22

23  
24 *P7: "Yes, it's the topic this question is about, that you can elaborate on if you*  
25 *want to (...) the person with the checklist shouldn't be bound to it 100% and*  
26 *slavishly follow it, but understand signals from the patient and talk more*  
27 *broadly and connect it to the other things that depend upon it". (agreement)*  
28

29  
30 *P9: "Absolutely".*  
31

32  
33 *P7: "Otherwise, it just becomes mechanical; you can't be just like a computer*  
34 *asking questions".*  
35

36  
37 (Group 2. Patients)  
38

39  
40 There were conflicting opinions about how to apply the questions in the PSC. Experienced  
41 HPs preferred to use it as a supplement for memory within a free dialogue. In contrast,  
42 inexperienced HPs perceived the specific questions as good to assume and a basis for leading  
43 into other related concerns (e.g. fatigue):  
44  
45  
46  
47

48  
49 *P5: "It's more about if you think that you should use standardised things for*  
50 *everyone, even for primary healthcare/outpatient care, I don't think that really*  
51 *works".*  
52

53  
54 *P6: "Exactly, that's the question, should you use the checklist just as it is, or*  
55 *should you use it for your own part and remember. That's the thing, because*  
56 *you can then approach each patient differently and get it all. But asking the*  
57 *exact same questions for each patient, I agree, that's really hard to do".*  
58

59  
60 (Group 3. HPs)

### PSC as a systematic routine and a basis for egalitarian follow-up

#### *The PSC as a shared knowledge base to be individualised for each patient*

The PSC was considered to increase knowledge about stroke and secure an egalitarian follow-up, especially for inexperienced HPs and patients with limited ability to express their needs. Even when the PSC was used, lack of HPs with stroke expertise and limited knowledge about opportunities for referrals were perceived as an obstacle to egalitarian follow-up. One suggestion was to add local referral opportunities and access to scientific references in conjunction with the PSC. Factors such as comorbidities and time since stroke must be taken into account because they could affect responses to PSC items.

#### *The PSC supports continuity and referrals but depends on available resources*

Participants addressed the need for regular follow-ups and considered the PSC to be a useful tool and basis for referrals. The use of the PSC was seen as a rapid way to cover the problem areas if only the questions were used, but when supplementary questions were needed, the time need also increased. One concern, especially among the physicians, was the time taken to administer the PSC in addition to their ordinary routines. HPs emphasised that the use of the PSC should be beneficial for the patients and in accordance with time limits and referral opportunities. Some considered it a bit rigid to go through all items if the patient experienced no problems, although it was observed that it could be completed quickly.

To enable preparation beforehand and make visits more time-efficient, a patient version of the PSC was proposed. Participants strongly emphasised that problems identified by the PSC should lead to appropriate intervention and not only an evaluation of current status:

*P11: "The risk is you might get a false sense of security though. So, someone has asked the question, and I have answered "yes" to this question; so I then expect something to happen".*

(agreement from the others)

*P11: "It's like, that's what decides the quality of what happens with the measures (...). It should end with me knowing how this information is taken and handled, what happens now. Not just that you do it and then that's great. (mumbles) Is it like statistics or what?"*

(Group 1. Patients)



Lack of opportunities for interventions as well as knowledge gaps were expressed by HPs as difficulties in meeting these expectations. A specific dimension of this problem was mentioned as leading to a risk of avoidance of discussing certain items.

Table 3. Evaluation of the use of Post-Stroke Checklist (PSC) based on satisfaction ratings (Likert 1-5) by patients and health professionals.

| Satisfaction with:                        | Patients (n=46)<br>median (IQR) | Health professionals<br>(n=10) median (IQR) |
|-------------------------------------------|---------------------------------|---------------------------------------------|
| Overall assessment where PSC was used     | 5 (4-5)                         | 4 (3-4)                                     |
| Identification of needs                   | 5 (4-5)                         | -                                           |
| Identification of need (for each patient) | -                               | 3 (3-4)                                     |
| Confidence in receiving support           | 5 (4-5)                         | -                                           |
| Guidance for referrals and treatment      | -                               | 3 (2-4)                                     |

Abbreviations: IQR= interquartile range

By combining the results derived by different methods, additional aspects of the analysis can be demonstrated. The patients evaluated the satisfaction with the PSC as high (table 3). In addition, the focus group analyses gave insights into a wide range of factors that affect satisfaction, and its feasibility was exemplified by the importance of dialogue (figure 3). HP satisfaction with the PSC varied among patients (table 3). Participants perceived it as important to adapt the use of the PSC to individual aspects. Some differences regarding individual prerequisites are displayed in table 2, and others are mentioned in the qualitative analyses. HP stroke experience varied, especially in the primary care settings (table 2). In the focus group discussions, HPs with stroke expertise was perceived as important if subtle problems were to be properly recognised.

## DISCUSSION

The PSC is a relevant and feasible tool to identify patients who can benefit from targeted interventions, as noted by people with stroke and HPs. The original purpose of the PSC was to be an easy-to-use tool to detect post-stroke problems, as well as a support for guiding referrals.<sup>11</sup> This study brings out an awareness about how follow-up through the PSC could be enhanced by user perceptions and suggested strategies. This knowledge could add important insights when implementing the PSC in line with the World Stroke Organization recommendations. The focus group discussions raised issues concerning prerequisites when



1  
2  
3 using the PSC. These include HP with stroke expertise, room for dialogue, and how the  
4 identified needs were addressed.  
5

6 The wide range of post-stroke problems identified in the present study demonstrated the  
7 relevance of the PSC, with a median of four problems per patient. Of note, reported problems  
8 on specific PSC items differ considerably; 'life after stroke', cognition, and continence vary  
9 when comparing among countries.<sup>12-14</sup> Comparison should be made with caution since the  
10 groups studied differ with respect to e.g. case-mix, sampling strategies and inclusion criteria  
11 in the studies. Further, based on issues raised in the focus group discussions, likely causes of  
12 these discrepancies in reported problems could be HP stroke expertise, opportunity for a  
13 dialogue, and time limits on the administration of the PSC. Comorbidities also could affect  
14 responses to the PSC items due to respondents not being able to consider whether the  
15 problems are stroke related or not. Nevertheless, the wide range of identified problems  
16 alongside participant perceptions in this study stresses the relevance of using the PSC in  
17 clinical practice. The long-term consequences after stroke emphasise the need for a  
18 comprehensive long-term follow-up with a multi-domain approach.<sup>13 21-23</sup>  
19  
20  
21  
22  
23  
24  
25  
26  
27  
28

29 The present study provides a deeper understanding of how the PSC structure could  
30 support patients in expressing their needs. Problems with communication and comprehension  
31 are common after stroke,<sup>5</sup> which influences decision-making during follow-up. Participation  
32 in decision-making requires health literacy, i.e., the ability to understand health information  
33 and a capacity to argue for one's needs in relation to appropriate interventions.<sup>7</sup> In this study,  
34 despite perceptions that the PSC questions were easy to understand, dialogue was found to be  
35 crucial. Participants raised concerns about problem areas that could be missed depending on  
36 how the PSC was used. Results from using the PSC in the UK and Singapore<sup>12</sup> indicate that  
37 several problem areas could be indirectly identified. Awareness of the complexity of need  
38 identification underscores the role of the HP when using the PSC. Even if no unmet need is  
39 reported, a person can still identify as living with residual impairments and perceived  
40 problems in engaging in activities.<sup>24</sup> Participants expressed that identification of needs could  
41 be enhanced if more time were allowed for consideration of these needs and for additional  
42 questions; another help would be the opportunity to fill in the PSC beforehand. Current  
43 findings stress HP with stroke expertise and the need to make space for dialogue when  
44 administering the PSC to support needs identification and decision-making.  
45  
46  
47  
48  
49  
50  
51  
52  
53  
54  
55

56 The results from the present study highlight the dialogue between the patient and HP,  
57 which is central in health care.<sup>9 10 25</sup> Experienced HPs argued that they could cover most  
58 topics using open-ended questions. In contrast, others emphasised the value of articulating the  
59  
60

1  
2  
3 PSC questions literally. To enable investigation of specific areas, closed questions can be  
4 important<sup>26</sup> and facilitate situations involving patients with communication difficulties.  
5  
6 However, the PSC instructions do not hinder its use in a looser way as long as all areas are  
7  
8 captured. The result shows that patients can benefit from a clear structure when the PSC is  
9  
10 used. Participants in all focus groups agreed on the benefits of going through the areas in the  
11  
12 PSC in a way that ensures identification of unmet needs. In addition, using the PSC in  
13  
14 combination with dialogue supports the patients' capacity to communicate their needs. A  
15  
16 narrative communication, along with signs of problems, gives the HP a foundation for  
17  
18 planning care together with the patient and creates conditions for patients to make appropriate  
19  
20 health decisions.<sup>10</sup>

21  
22 The PSC can improve clinical pathways in health care by its structure and guidance for  
23  
24 further referrals. Creating a plan to take care of identified needs and locally adapted pathways  
25  
26 to support access to appropriate interventions, was noted in the focus group discussions as  
27  
28 essential.

### 29 **Strengths and limitations**

30  
31 A strength of this study is that patients were partners throughout the project, from the  
32  
33 translation process to participation in the focus group discussions. In addition, the mix of  
34  
35 methods made it possible to explore the feasibility of the PSC at different levels compared to  
36  
37 previous research. Few persons in this population had lived with their stroke for a long time,  
38  
39 and only one of them had a severe stroke, which might have affected which problems were  
40  
41 identified (e.g. spasticity). This naturalistic design in an ordinary outpatient context, however,  
42  
43 is representative of the Swedish population, where the majority have mild stroke.<sup>27</sup> The time  
44  
45 (1-2 months) between the follow-up visit where the PSC was used and the focus group  
46  
47 discussion could be a risk for recall bias. However, the focus group methodology enabled  
48  
49 exploring a range of opinions of people across groups, and together, the participants  
50  
51 contributed to rich discussions. Although the attempt was to obtain heterogeneity and  
52  
53 homogeneity in the focus groups, the majority of HPs were women and the majority of the  
54  
55 patients were male. Because the purposive sampling of HPs were made based on health care  
56  
57 facilities already chosen and the defined time limit between the visit and the focus groups, the  
58  
59 sex distribution were out of our influence. However, heterogeneity was achieved with respect  
60  
61 to different outpatient settings, patients having a range of ages, stroke characteristics, and  
62  
63 education levels, and HPs with a range of professional roles and experience in stroke. To  
64  
65 strengthen the transferability of the findings, a comprehensive description of the study

1  
2  
3 context, participant characteristics, data collection, and analysis process are included in the  
4 methods section. Nevertheless, there are limitations regarding the transferability of the  
5 findings outside of the Swedish healthcare context. To ensure the feasibility of using the PSC  
6 in another context, a cross-cultural validation is needed. However, because the World Stroke  
7 Organization recommends using the PSC globally, these results contribute to a deeper  
8 understanding of its feasibility that can also be useful to other countries.  
9  
10  
11  
12  
13  
14

### 15 **Conclusions**

16 The PSC is a feasible and relevant tool to support egalitarian follow-up and identify patients  
17 who can benefit from targeted interventions after stroke. HPs' stroke expertise, room for  
18 dialogue, and caring for identified needs were raised as important issues to consider when  
19 using the PSC. Nutrition, sexuality, driving, work, vision, irritability and fatigue were areas  
20 mentioned that might need to be addressed within the discussions by HPs using the checklist.  
21 The PSC can facilitate patients in expressing their needs, enhancing their ability to participate  
22 in decision-making.  
23  
24  
25  
26  
27  
28  
29

### 30 **Acknowledgements**

31 The authors thank the health professionals and patients, for sharing their experiences. The  
32 authors also thank Dr Kate Bramley-Moore translation help regarding quotations from the  
33 transcribed interviews.  
34  
35  
36  
37  
38  
39

### 40 **Author contribution**

41 EK, ÅL-N, and KSS contributed to the design of the study. EK conducted the interviews and  
42 analyzed the data together with GC, involving KSS and ÅL-N in the final stages of the  
43 analysis. EK wrote the first version of the manuscript, which was reviewed by GC, ÅL-N  
44 KSS. All four authors contributed to and approved the final manuscript.  
45  
46  
47  
48

### 49 **Funding**

50 The study was funded in part by the Swedish Stroke Association; the Local Research and  
51 Development Board for Gothenburg and Södra Bohuslän; the Swedish Heart and Lung  
52 Foundation; the Swedish Brain Foundation; an unconditional grant from Allergan; the  
53 Hjalmar Svenssons Foundation; Neurological Foundation; Greta and Einar Askers  
54 Foundation; Rune and Ulla Amlövs Foundation; Per-Olof Ahls Foundation; and John and Brit  
55 Wennerströms Foundation. The study was supported by grants from the Swedish state under  
56  
57  
58  
59  
60

1  
2  
3 the agreement between the Swedish government and the county councils, the ALF agreement  
4 (ALFGBG-719 80).  
5

### 6 7 **Competing interests**

8  
9 None declared.

### 10 11 **Data sharing**

12  
13 Due to ethical restrictions, data are available upon request. Researchers can submit requests  
14 for data to the authors (contact: ks.sunnerhagen@neuro.gu.se). Complete data from interviews  
15 cannot be made publicly available for ethical and legal reasons, according to the Swedish  
16 regulations <http://www.epn.se/en/start/regulations/>. Public availability would compromise  
17 participant privacy or confidentiality. Upon request a list of condensed meaning units or codes  
18 can be made available after removal of information that may risk the confidentiality of the  
19 participants. To access data please contact the first author: (emma.kjork@neuro.gu.se).  
20  
21  
22  
23  
24  
25  
26  
27  
28  
29

30  
31 **Figure 1. The steps included in the validation and cross-cultural adaptation of the**  
32 **Swedish version of the PSC including background work and current study.**  
33  
34  
35  
36  
37  
38

39  
40 **Figure 2. Percentages of patients with identified problems in each Post-Stroke Checklist**  
41 **item (n=46).**  
42  
43  
44  
45  
46

47  
48 **Figure 3. Themes and subthemes derived from the focusgroup discussions with patients**  
49 **and health professionals regarding experiences of using the Post-Stroke Checklist.**  
50  
51  
52  
53  
54  
55  
56  
57  
58  
59  
60

1  
2  
3 **REFERENCES**  
4

- 5  
6 1. Crichton SL, Bray BD, McKeivitt C, et al. Patient outcomes up to 15 years after stroke:  
7 survival, disability, quality of life, cognition and mental health. *J Neurol Neurosurg*  
8 *Psychiatry* 2016;87(10):1091-8. doi: 10.1136/jnnp-2016-313361  
9
- 10 2. Ullberg T, Zia E, Petersson J, et al. Changes in functional outcome over the first year after  
11 stroke: an observational study from the Swedish stroke register. *Stroke*  
12 2015;46(2):389-94. doi: 10.1161/STROKEAHA.114.006538  
13
- 14 3. Ullberg T, Zia E, Petersson J, et al. Perceived Unmet Rehabilitation Needs 1 Year After  
15 Stroke: An Observational Study From the Swedish Stroke Register. *Stroke*  
16 2016;47(2):539-41. doi: 10.1161/STROKEAHA.115.011670  
17
- 18 4. Carlsson GE, Moller A, Blomstrand C. Consequences of mild stroke in persons <75 years -  
19 - a 1-year follow-up. *Cerebrovasc Dis* 2003;16(4):383-8. doi: 10.1159/000072561  
20
- 21 5. Cumming TB, Marshall RS, Lazar RM. Stroke, cognitive deficits, and rehabilitation: still  
22 an incomplete picture. *Int J Stroke* 2013;8(1):38-45. doi: 10.1111/j.1747-  
23 4949.2012.00972.x  
24
- 25 6. Levasseur M, Carrier A. Integrating health literacy into occupational therapy: Findings  
26 from a scoping review. *Scand J Occup Ther* 2012;19(4):305-14. doi:  
27 10.3109/11038128.2011.588724  
28
- 29 7. Mackey LM, Doody C, Werner EL, et al. Self-Management Skills in Chronic Disease  
30 Management: What Role Does Health Literacy Have? *Med Decis Making*  
31 2016;36(6):741-59. doi: 10.1177/0272989X16638330 [published Online First:  
32 2016/04/08]  
33
- 34 8. Kirkevold M. The unfolding illness trajectory of stroke. *Disabil Rehabil* 2002;24(17):887-  
35 98. doi: 10.1080/09638280210142239  
36
- 37 9. Tistad M, Ytterberg C, Tham K, et al. Poor concurrence between disabilities as described  
38 by patients and established assessment tools three months after stroke: a mixed  
39 methods approach. *J Neurol Sci* 2012;313(1-2):160-6. doi: 10.1016/j.jns.2011.08.038  
40 [published Online First: 2011/09/23]  
41
- 42 10. Ekman I, Swedberg K, Taft C, et al. Person-centered care—Ready for prime time. *Eur J*  
43 *Cardiovasc Nurs* 2011;10(4):248-51.  
44
- 45 11. Philp I, Brainin M, Walker MF, et al. Development of a poststroke checklist to  
46 standardize follow-up care for stroke survivors. *J Stroke Cerebrovasc Dis*  
47 2013;22(7):e173-80. doi: 10.1016/j.jstrokecerebrovasdis.2012.10.016  
48  
49  
50  
51  
52  
53  
54  
55  
56  
57  
58  
59  
60

12. Ward AB, Chen C, Norrving B, et al. Evaluation of the Post Stroke Checklist: a pilot study in the United Kingdom and Singapore. *Int J Stroke* 2014;9 Suppl A100(A100):76-84. doi: 10.1111/ijvs.12291
13. Iosa M, Lupo A, Morone G, et al. Post Soft Care: Italian implementation of a post-stroke checklist software for primary care and identification of unmet needs in community-dwelling patients. *Neurol Sci* 2017;39(1):135-39. doi: 10.1007/s10072-017-3140-1
14. Hotter B, Padberg I, Liebenau A, et al. Identifying unmet needs in long-term stroke care using in-depth assessment and the Post-Stroke Checklist – The Managing Aftercare for Stroke (MAS-I) study. *European Stroke Journal* 2018;3(3):237-45. doi: 10.1177/2396987318771174
15. Krueger RA. Focus groups: A practical guide for applied research. 5th ed. London: Sage publications 2014.
16. Ivanoff SD, Hultberg J. Understanding the multiple realities of everyday life: basic assumptions in focus-group methodology. *Scand J Occup Ther* 2006;13(2):125-32.
17. Craig P, Dieppe P, Macintyre S, et al. Developing and evaluating complex interventions: the new Medical Research Council guidance. *BMJ* 2008;337:a1655. doi: 10.1136/bmj.a1655
18. Beaton DE, Bombardier C, Guillemin F, et al. Guidelines for the process of cross-cultural adaptation of self-report measures. *Spine (Phila Pa 1976)* 2000;25(24):3186-91. [published Online First: 2000/12/22]
19. Tong A, Sainsbury P, Craig J. Consolidated criteria for reporting qualitative research (COREQ): a 32-item checklist for interviews and focus groups. *Int J Qual Health Care* 2007;19(6)
20. Malterud K, Siersma VD, Guassora AD. Sample Size in Qualitative Interview Studies: Guided by Information Power. *Qual Health Res* 2015 doi: 10.1177/1049732315617444 [published Online First: 2015/11/29]
21. Paul SL, Srikanth VK, Thrift AG. The large and growing burden of stroke. *Curr Drug Targets* 2007;8(7):786-93. [published Online First: 2007/07/17]
22. Stevens E, Emmett E, Wang DY, et al. The Burden Of Stroke In Europe Report London: SAFE Stroke Alliance For Europe 2017.
23. Norrving B, Barrick J, Davalos A, et al. Action Plan for Stroke in Europe 2018–2030. *European Stroke Journal*;0(0):2396987318808719. doi: 10.1177/2396987318808719

- 1  
2  
3 24. Shannon RL, Forster A, Hawkins RJ. A qualitative exploration of self-reported unmet  
4 need one year after stroke. *Disabil Rehabil* 2016;38(20):2000-7. doi:  
5 10.3109/09638288.2015.1107784  
6  
7  
8 25. Williams MV, Davis T, Parker RM, et al. The role of health literacy in patient-physician  
9 communication. *Fam Med* 2002;34(5):383-9.  
10  
11 26. Silverman J, Kurtz S, Draper J. Skills for communicating with patients. 3rd ed. London:  
12 CRC Press 2016.  
13  
14  
15 27. Reinholdsson M, Palstam A, Sunnerhagen KS. Prestroke physical activity could influence  
16 acute stroke severity (part of PAPSIGOT). *Neurology* 2018;91(16):e1461-e67. doi:  
17 10.1212/WNL.0000000000006354 [published Online First: 2018/09/21]  
18  
19  
20  
21  
22  
23  
24  
25  
26  
27  
28  
29  
30  
31  
32  
33  
34  
35  
36  
37  
38  
39  
40  
41  
42  
43  
44  
45  
46  
47  
48  
49  
50  
51  
52  
53  
54  
55  
56  
57  
58  
59  
60



45 Figure 1. The steps included in the validation and cross-cultural adaptation of the Swedish version of the  
46 PSC including background work and current study.

47 199x267mm (300 x 300 DPI)





Figure 2. Percentages of patients with identified problems in each Post-Stroke Checklist item (n=46).

229x160mm (300 x 300 DPI)



28 Figure 3. Themes and subthemes derived from the focusgroup discussions with patients and health  
29 professionals regarding experiences of using the Post-Stroke Checklist.

30 169x111mm (300 x 300 DPI)

31  
32  
33  
34  
35  
36  
37  
38  
39  
40  
41  
42  
43  
44  
45  
46  
47  
48  
49  
50  
51  
52  
53  
54  
55  
56  
57  
58  
59  
60

## COREQ 32-item checklist

| No. Item                                       | Guide questions/description                                  | Comments                                                                                                         |
|------------------------------------------------|--------------------------------------------------------------|------------------------------------------------------------------------------------------------------------------|
| <b>Domain 1: Research team and reflexivity</b> |                                                              |                                                                                                                  |
| <i>Personal characteristics</i>                |                                                              |                                                                                                                  |
| 1. Interviewer/facilitator                     | Which author/s conducted the interview?                      | EK (p.6)                                                                                                         |
| 2. Credentials                                 | What were the researcher's credentials? <i>e.g., PhD, MD</i> | 3 Occupational Therapists (1 associate professor, 1 PhD, and 1 MS, PhD student)<br>1 Medical doctor, (Professor) |
| 3. Occupation                                  | What was their occupation at the time of the study?          | Researchers                                                                                                      |
| 4. Gender                                      | Was the researcher male or female?                           | 4 female (p. 6-7)                                                                                                |
| 5. Experience and training                     | What experience or training did the researchers have?        | > 20 years in stroke rehab, Qualitative research (p. 7)                                                          |
| <i>Relationship with participants</i>          |                                                              |                                                                                                                  |

|                                             |                                                                                                                                                                 |                                                                                                      |
|---------------------------------------------|-----------------------------------------------------------------------------------------------------------------------------------------------------------------|------------------------------------------------------------------------------------------------------|
| 6. Relationship established                 | Was a relationship established prior to study commencement?                                                                                                     | The moderator had met some of the health professionals in work related situations.                   |
| 7. Participant knowledge of the interviewer | What did the participants know about the researcher? <i>e.g., personal goals, reasons for doing the research</i>                                                | Broad outlines given                                                                                 |
| 8. Interviewer characteristics              | What characteristics were reported about the interviewer/facilitator?<br><i>E.g., bias, assumptions, reasons and interests in the research topic</i>            | (p. 5)                                                                                               |
| <b>Domain 2: study design</b>               |                                                                                                                                                                 |                                                                                                      |
| <i>Theoretical framework</i>                |                                                                                                                                                                 |                                                                                                      |
| 9. Methodological orientation and Theory    | What methodological orientation was stated to underpin the study? <i>e.g. grounded theory, discourse analysis, ethnography, phenomenology, content analysis</i> | Focus group according to Kreuger, underpinned by a methodology based on Social constructivism (p. 4) |
| <i>Participant selection</i>                |                                                                                                                                                                 |                                                                                                      |

|                                  |                                                                                           |                                                                                 |
|----------------------------------|-------------------------------------------------------------------------------------------|---------------------------------------------------------------------------------|
| 10. Sampling                     | How were participants selected? <i>e.g. purposive, convenience, consecutive, snowball</i> | Purposive (p. 5)                                                                |
| 11. Method of approach           | How were participants approached? <i>e.g. face-to-face, telephone, mail, email</i>        | Face to face and by telephone (p. 5)                                            |
| 12. Sample size                  | How many participants were in the study?                                                  | In total, 18 (patients/HPs) participated in the focus groups (see table 2, p 7) |
| 13. Non-participation            | How many people refused to participate or dropped out? Reasons?                           | One dropped out because of a scheduled medical examination (p. 9)               |
| <i>Setting</i>                   |                                                                                           |                                                                                 |
| 14. Setting of data collection   | Where was the data collected? <i>e.g. home, clinic, workplace</i>                         | Clinical setting (p. 5)                                                         |
| 15. Presence of non-participants | Was anyone else present besides the participants and researchers?                         | No (p. 6)                                                                       |
| 16. Description of sample        | What are the important characteristics of the sample? <i>e.g. demographic data, date</i>  | People with stroke in a late phase of stroke recovery (p. 7, table 2)           |
| <i>Data collection</i>           |                                                                                           |                                                                                 |

|                                        |                                                                               |                                                                                |
|----------------------------------------|-------------------------------------------------------------------------------|--------------------------------------------------------------------------------|
| 17. Interview guide                    | Were questions, prompts, guides provided by the authors? Was it pilot tested? | A interview guide was provided (p.6).<br>A pilot testing was conducted (p. 5). |
| 18. Repeat interviews                  | Were repeat interviews carried out?                                           | No, each group met once (p. 6)                                                 |
| 19. Audio/visual recording             | Did the researchers use audio or visual recording to collect the data?        | Audio (p. 6 )                                                                  |
| 20. Field notes                        | Were field notes made during and/or after the interview or focus group?       | Yes                                                                            |
| 21. Duration                           | What was the duration of the interviews or focus group?                       | Approximately 1.5 hours (p. 6 )                                                |
| 22 Data saturation                     | Was data saturation discussed?                                                | Yes (p. 6)                                                                     |
| 23. Transcripts returned               | Were transcripts returned to participants for comment and/or correction?      | No                                                                             |
| <b>Domain 3: analysis and findings</b> |                                                                               |                                                                                |
| <i>Data analysis</i>                   |                                                                               |                                                                                |
| 24. Number of data coders              | How many data coders coded the data?                                          | Two (EK and GC) (p. 6 )                                                        |
| 25. Description of the coding tree     | Did authors provide a description of the coding tree?                         | Yes.                                                                           |
| 26. Derivation of themes               | Were themes identified in advance or derived from the data?                   | Derived from the data (p. 6)                                                   |

|                                  |                                                                                                                                        |                                                         |
|----------------------------------|----------------------------------------------------------------------------------------------------------------------------------------|---------------------------------------------------------|
| 27. Software                     | What software, if applicable, was used to manage the data?                                                                             | Nvivo (p. 6)                                            |
| 28. Participant checking         | Did participants provide feedback on the findings?                                                                                     | No, not specifically, but a general presentation (p. 5) |
| <i>Reporting</i>                 |                                                                                                                                        |                                                         |
| 29. Quotations presented         | Were participant quotations presented to illustrate the themes/findings? Was each quotation identified? <i>e.g. participant number</i> | Yes (Results)                                           |
| 30. Data and findings consistent | Was there consistency between the data presented and the findings?                                                                     | Yes (Results and Discussion)                            |
| 31. Clarity of major themes      | Were major themes clearly presented in the findings?                                                                                   | Yes (Figure 3 and results)                              |
| 32. Clarity of minor themes      | Is there a description of diverse cases or discussion of minor themes?                                                                 | Yes (Results and Discussion)                            |
